1 **Selective sorting of microRNAs into exosomes by phase-**  
2 **separated YBX1 condensates**

3 Alternative title: Condensation of YBX1 into processing bodies reveals mechanisms for  
4 selective sorting of microRNAs into exosomes

5 Xiao-Man Liu<sup>1</sup>, Liang Ma<sup>1</sup>, and Randy Schekman<sup>1\*</sup>

6 <sup>1</sup>Department of Molecular and Cell Biology, Howard Hughes Medical Institute,  
7 University of California, Berkeley, United States.

8 \*For correspondence:

9 [schekman@berkeley.edu](mailto:schekman@berkeley.edu)

## 10 **Abstract**

11 Exosomes may mediate cell-to-cell communication by transporting various proteins and  
12 nucleic acids to neighboring cells. Some protein and RNA cargoes are significantly  
13 enriched in exosomes. How cells efficiently and selectively sort them into exosomes  
14 remains incompletely explored. Previously we reported that YBX1 is required in sorting  
15 of miR-223 into exosomes. Here we show that YBX1 undergoes liquid-liquid phase  
16 separation (LLPS) *in vitro* and in cells. YBX1 condensates selectively recruit miR-223 *in*  
17 *vitro* and into exosomes secreted by cultured cells. Point mutations that inhibit YBX1  
18 phase separation impair the incorporation of YBX1 protein into biomolecular  
19 condensates formed in cells, and perturb miR-233 sorting into exosomes. We propose  
20 that phase separation-mediated local enrichment of cytosolic RNA binding proteins and  
21 their cognate RNAs enables their targeting and packaging by vesicles that bud into  
22 multivesicular bodies. This provides a possible mechanism for efficient and selective  
23 engulfment of cytosolic proteins and RNAs into intraluminal vesicles which are then  
24 secreted as exosomes from cells.

25

26

## 27 **Introduction**

28 Extracellular vesicles (EVs) secreted into the extracellular space appear to  
29 mediate some forms of intercellular communication (Colombo et al., 2014; Maia et al.,  
30 2018; Song et al., 2021 (in press in the J Cell Biol)). Different sub-populations of EVs  
31 bud from the plasma membrane or arise from membrane internalized into endosomes to  
32 form multi-vesicular bodies (MVB) that fuse at the cell surface to secrete intraluminal  
33 vesicles (ILV). Secreted ILVs, referred to as exosomes, are typically 30-150 nm vesicles  
34 with a buoyant density of ~ 1.10-1.19 g/ml (Mincheva-Nilsson et al., 2016). Plasma  
35 membrane-derived microvesicles, also referred to as shedding vesicles, are more  
36 heterogeneous with sizes ranging from 30 to 1,000 nm (Cocucci et al., 2009; Raposo and  
37 Stoorvogel, 2013). During their biogenesis, EVs may selectively capture proteins, lipids,  
38 metabolites, and nucleic acids which vary according to the cell of origin.

39 The selectivity for cargo sorting into EVs is best studied for RNA molecules.  
40 Several RNA binding proteins (RBPs), including heterogeneous nuclear  
41 ribonucleoproteins A2/B1 (hnRNPA2B1) (Villarroya-Beltri et al., 2013), SYNCRIP  
42 (Hobor et al., 2018; Santangelo et al., 2016), HuR (Mukherjee et al., 2016) and major  
43 vault protein (MVP) (Statello et al., 2018; Teng et al., 2017), have been implicated in the  
44 sorting of RNAs into EVs. In these studies, extracellular vesicles were isolated by  
45 sedimentation at ~100,000 xg. These crude EV preparations contain heterogeneous  
46 populations of vesicles and membrane-free ribonucleoprotein particles (RNPs), which has  
47 complicated the study of requirements for sorting selectivity. To solve this problem, our  
48 lab developed a buoyant density based procedure to resolve EVs into two fractions and  
49 found that certain miRNAs are highly enriched in exosomes as opposed to EVs of lower  
50 buoyant density (Shurtleff et al., 2016; Temoche-Diaz et al., 2020). We further  
51 demonstrated that an RBP, YBX1, is required for selective sorting of miR-223 into  
52 exosomes in a cell-free reaction that recapitulates miRNA sorting into vesicles and in  
53 cultured cells (Shurtleff et al., 2016). In subsequent work, we identified another RBP,  
54 Lupus La protein, that is required for selective sorting of miR-122 into exosomes in the  
55 breast cancer cell line, MDA-MB-231(Temoche-Diaz et al., 2019). However, the means

56 by which certain RNPs are efficiently and selectively packaging into exosomes remains  
57 unclear.

58 Eukaryotic cells form compartments that contain both membrane-bound  
59 organelles and non-membrane-bound organelles to optimize the efficiency of biological  
60 processes (Wheeler and Hyman, 2018). Membraneless organelles, also referred to as  
61 biomolecular condensates, are assembled via liquid-liquid phase separation (LLPS), a  
62 process in which molecules such as proteins, RNA and other biopolymers are  
63 concentrated into a liquid-like compartment. Examples include cytoplasmic condensates  
64 such as stress granules, processing bodies (P-bodies), germline P-granules and nuclear  
65 condensates such as the nucleolus, Cajal bodies and paraspeckles. The constituents in  
66 these condensates exhibit high mobility and rapidly exchange with the surrounding  
67 cytoplasm or nucleoplasm (Banani et al., 2017; Shin and Brangwynne, 2017; Zhao and  
68 Zhang, 2020). LLPS is mediated by weak, transient interactions conferred by proteins  
69 with intrinsically disordered regions (IDRs) and/or multivalent domains (Molliex et al.,  
70 2015; Shin and Brangwynne, 2017; Wheeler and Hyman, 2018). IDRs lack a fixed or  
71 ordered three-dimensional structure and often comprise biased amino acids, in particular  
72 polar and charged residues, including glycine, serine, glutamine, arginine and lysine, and  
73 aromatic residues (e.g., tyrosine and phenylalanine) (Shin and Brangwynne, 2017).  
74 Amino acid side chain charge-charge, charge- $\pi$ , and  $\pi$ - $\pi$  stacking interactions have been  
75 implicated in LLPS condensate formation (Brangwynne et al., 2015). Protein-RNA and  
76 RNA-RNA interactions also contribute to RNP condensates such as stress granules and  
77 P-bodies (Tauber et al., 2020; Yang et al., 2020). Liquid-like condensates may harden  
78 over time into less fluid structures, such as hydrogels. Aberrant phase transition may be  
79 the basis of certain neurodegenerative disorders and cancer (Alberti and Hyman, 2016;  
80 Nedelsky and Taylor, 2019; Taylor et al., 2016).

81 Phase-separated condensates exhibit selective properties, favoring some proteins  
82 and RNAs and excluding others (Alberti et al., 2019). P-bodies, for example, are  
83 cytoplasmic RNA granules formed by condensation of translationally repressed mRNAs  
84 associated with proteins related to mRNA decay (Luo et al., 2018; Parker and Sheth,  
85 2007; Teixeira et al., 2005). P-body proteomes are enriched in proteins containing IDRs  
86 (Youn et al., 2019), including those involved in mRNA decapping and decay and

87 miRNA/siRNA silencing (Luo et al., 2018). MiRNAs, their cognate mRNAs and  
88 proteins related to miRNA-mediated suppression, including Ago proteins, GW182, Rck,  
89 and MOV10 are concentrated in P-bodies (Eystathioy et al., 2003; Kulkarni et al., 2010;  
90 Liu et al., 2005a, 2005b; Sen and Blau, 2005).

91 Phase-separated condensates have been implicated in the membrane enclosure of  
92 cytosolic proteins associated with autophagy. Cargo proteins such as the Ape1 complex,  
93 the PGL granule, and p62, the autophagy cargo receptor, form phase-separated protein  
94 condensates, triggering formation of surrounding autophagosomes to ensure their specific  
95 and efficient transport to lysosomes or the vacuole (Sun et al., 2018; Yamasaki et al.,  
96 2020; Zhang et al., 2018). By extension, it seems likely that RNA-binding proteins may  
97 form condensates as a precursor to engulfment by endosomal membranes. Indeed, YBX1  
98 contains an IDR sequence and was reported to be associated with P-bodies (Yang and  
99 Bloch, 2007) and involved in stress granule formation (Lyons et al., 2016; Somasekharan  
100 et al., 2015).

101 In this study, we report evidence that the YBX1 protein efficiently forms liquid-  
102 like droplets *in vitro* and in cells. We observed that miR-223 but not miR-190 or miR-144  
103 efficiently partitioned into YBX1 droplets. YBX1 condensate formation required the C-  
104 terminal intrinsically disordered region (IDR), dependent on the aromatic residue tyrosine  
105 and positive charged residues arginine and lysine. Point mutations that rendered YBX1  
106 unable to phase separate disrupted YBX1 condensates in cells, interfered with  
107 recruitment of miR-223 to YBX1 droplets *in vitro*, and resulted in a failure of packaging  
108 of miR-223 into exosomes secreted by cells. We found that YBX1 condensed into  
109 processing bodies that contain several other proteins that were sorted into exosomes. We  
110 suggest that YBX1 liquid-like condensates may increase the local concentration of YBX1  
111 molecules and bound RNA, and thereby direct the selective sorting miRNAs into  
112 exosomes, thus coupling RNP granules to RNA packaging into exosomes.

113

## 114 **Results**

### 115 **YBX1 forms liquid-like condensates in cells**

116 We have previously shown that an RBP, YBX1, is present in purified exosomes  
117 and is required for sorting miRNAs into exosomes (Shurtleff et al., 2016). To further  
118 characterize how YBX1 functions in this process, we first examined its subcellular  
119 localization. Endogenous YBX1 was observed concentrated in puncta in the cytosol, as  
120 visualized by the use of specific YBX1 antibody and immunofluorescence (IF) in fixed  
121 cells (**Fig. 1A**). We hypothesized that the YBX1 puncta are liquid-like condensates that  
122 rapidly exchange their constituent molecules with the surrounding cytosol. To investigate  
123 this possibility, we constructed a stable cell line with YFP-tagged YBX1 that showed  
124 similar puncta as endogenous YBX1. Using this cell line, we performed fluorescence  
125 recovery after photobleaching (FRAP) experiments and found that after photobleaching,  
126 approximately 70% of fluorescence was recovered within 90 sec, suggesting a liquid-like  
127 behavior (**Fig. 1B**). A compound previously shown to disrupt liquid-liquid phase  
128 separation of biomolecules (1,6-hexanediol, Kroschwald et al., 2017) caused YBX1  
129 puncta to disassemble in a time- and concentration- dependent manner (**Fig. 1C, 1D and**  
130 **1E**). Another aliphatic alcohol, 2,5-hexanediol, which was reported to be much less  
131 active in the dissolution of FUS hydrogel droplets *in vitro* (Lin et al., 2016), was similarly  
132 less efficient in dissolving YBX1 puncta in cells (**Fig. 1D and 1E**). We further observed  
133 two YBX1 puncta coalesced to form a larger punctum within a few seconds, reflecting  
134 the liquid-like property of puncta (**Fig. 1F**). Thus, these data suggest that YBX1 forms a  
135 liquid-like biomolecular condensate in cells.

136

### 137 **YBX1 undergoes liquid-liquid phase separation (LLPS) *in vitro***

138 To address whether YBX1 exhibits liquid-like properties *in vitro*, we purified full-  
139 length recombinant human YBX1 protein fused to mGFP expressed in insect cells using  
140 the FlexiBAC system (Lemaitre et al., 2019) and performed phase separation assays with  
141 or without a molecular crowding agent, dextran (**Fig. 2A**). We detected phase separation  
142 of YBX1 protein at increasing protein concentrations (**Fig. 2A**). YBX1 started to form  
143 weak condensates at 3  $\mu$ M and liquid droplets at 5  $\mu$ M which corresponded to its  
144 approximate physiological cytosolic concentration in cells (4.6  $\mu$ M) (Itzhak et al., 2016).  
145 We also observed that YBX1 droplets were rapidly dispersed by 1,6-hexanediol treatment

146 **(Fig. 2B)**. As we observed in cells, two pure YBX1 droplets coalesced to form a larger  
147 spherical droplet, reflecting the nature of liquid-like droplets to minimize surface area by  
148 decreasing the surface/vol **(Fig. 2C)**. Correspondingly, in FRAP analysis, the  
149 mGFP::YBX1 fluorescence signal almost completely recovered 9 s after bleaching,  
150 consistent with the fluid state of YBX1 in granules in cells **(Fig. 2D and 2E)**. These data  
151 suggest that GFP-YBX1 phase separates to form liquid condensates *in vitro*. This  
152 behavior is intrinsic to YBX1 as the GFP molecule does not phase separate at these  
153 concentrations (Kanaan et al., 2020; Pak et al., 2016).

154

### 155 **YBX1 LLPS is likely driven by tyrosine-arginine residues in intrinsically disordered** 156 **region (IDR)**

157 YBX1 has three major domains: An N-terminal alanine/proline-rich (A/P)  
158 domain, a central cold shock domain (CSD), and a C-terminal domain (CTD) **(Fig. 3A)**.  
159 YBX1 is predicted to contain IDRs in both the N-terminal and C-terminal domains **(Fig.**  
160 **3A and Fig. 3 supplement 1)**. The long, C-terminal segment contains positively and  
161 negatively charged clusters of amino acids **(Fig. 3A)**. To identify the role of individual  
162 domains of YBX1 to form puncta in cells, we generated a series of constructs in which  
163 the A/P domain, CSD or the CTD were either deleted or expressed exclusively **(Fig. 3B**  
164 **and Fig. 3 supplement 2A)**. Deletion of the CTD (YBX1- $\Delta$ 128-324) completely blocked  
165 the formation of YBX1 puncta whereas the N-terminal A/P domain (YBX1- $\Delta$ 1-55) was  
166 dispensable for puncta formation **(Fig. 3C and Fig. 3 supplement 2A and 2B)**,  
167 suggesting that the C-terminal IDR rather than the N-terminal IDR was required for  
168 YBX1 condensate formation. Interestingly, the CTD (YBX1- $\Delta$ 1-127) expressed alone  
169 was predominantly localized to the nucleus, likely within the nucleolus **(Fig. 3**  
170 **supplement 2A and 2B)**, possibly due to nuclear export signals (NES) within the YBX1  
171 N-terminal domain (van Roeyen et al., 2013). The CSD (YBX1-CSD) showed an even  
172 cellular distribution and a deletion lacking CSD (YBX1- $\Delta$ CSD) was predominantly  
173 nuclear **(Fig. 3 supplement 2A and 2B)**. We next studied the effect of these mutations  
174 on YBX1 droplet formation *in vitro*. Consistent with our observation of transfected cells,  
175 we found that CTD was indispensable for YBX1 LLPS. YBX1-CTD alone (YBX1- $\Delta$ 1-

176 127) also formed liquid-like droplets, suggesting that the C-terminal IDR was sufficient  
177 and essential for YBX1 LLPS (**Fig. 3C and Fig. 3 supplement 2E**).

178 Specific residues within IDRs have previously been reported to be involved in  
179 condensate formation (Shin and Brangwynne, 2017), thus we analyzed the residue  
180 distribution within this domain of YBX1 (**Fig. 3A**). To further understand which amino  
181 acids contribute to IDR-driven YBX1 LLPS, we made several distinct variants of YBX  
182 based on the residue composition within the C-terminal IDR. Several polar but  
183 uncharged amino acids variants (CTD-Y to S/A, CTD-QN to G/A), a basic amino acid  
184 variant (CTD-RK to G), an acidic amino acid variant (CTD-DE to G) and a hydrophobic  
185 non-polar amino acid variant (CTD-VMF to A) were expressed in  $\Delta$ YBX1 cells (**Fig. 3B**  
186 **and Fig. 3 supplement 2C**). We first examined the subcellular localization of YFP-  
187 fusion forms of these variants in U2OS cells by transient transfection. Either replacing all  
188 the tyrosine residues in the C-terminal disordered region of YBX1 with serine  
189 residues/alanine residues (CTD-Y to S/A), or replacing all the arginine and lysine  
190 residues with glycine (CTD-RK to G), comprehensively impaired YBX1 condensate  
191 formation in cells (**Fig. 3C and Fig. 3 supplement 2C**). All the other mutants formed  
192 YBX1 condensates as efficiently as wild type (**Fig. 3C**). We next sought to determine if  
193 variants CTD-Y to S and CTD-RK to G were defective in LLPS of YBX1 in vitro with  
194 pure mGFP-fusion proteins expressed and isolated from insect cells (**Fig. 3 supplement**  
195 **2D**). In agreement with condensate formation in cells, YBX1 phase separation was  
196 severely impaired as indicated by the formation of smaller droplets at a higher range of  
197 protein concentrations of CTD-Y to S variant or completely deficient by substitution of  
198 arginine and lysine residues with glycine in the CTD (CTD-RK to G) (**Fig. 3D**). We  
199 further noticed that tyrosines in the CTD are relatively uniformly distributed (**Fig. 3B**),  
200 consistent with a phase separation that fits the sticker-and-spacer model pattern of  
201 aromatic residues such as has been proposed for RNA-binding proteins (Martin et al.,  
202 2020). These results suggest that YBX1 phase separation is driven by the IDR region,  
203 most likely through interactions among tyrosine- and arginine-rich motifs.

204 The YBX1 CSD is highly evolutionarily conserved and contains two consensus  
205 ribonucleoprotein (RNP) 1 and 2 sequences. The aromatic amino acid residues Phe74,  
206 Phe85, and His87 within these motifs form a hydrophobic cluster on the protein surface



207 that participates in DNA or RNA binding (Kloks et al., 2002; Yang et al., 2019). A  
208 single amino acid Phe to Ala mutation (F85A), was reported to block YBX1-specific  
209 RNA binding (Lyons et al., 2016). The alternating basic and acidic clusters of the CTD  
210 are implicated in nonspecific nucleic acid binding as well as protein-protein interaction  
211 (Mordovkina et al., 2020). In our previous work, YBX1 was identified in purified  
212 exosomes and found to be required for sorting miR-223 into exosomes. We hypothesized  
213 that there might be a direct interaction between YBX1 and miR-223. Purified  
214 recombinant YBX1 interacts directly with 5' fluorescently-labeled miR-223 and F85A  
215 YBX1 abolishes that interaction as quantified by an electrophoretic mobility shift assay  
216 (Ma, L. and RS, in preparation). Mutation of Phe85 to Ala caused YBX1 translocation  
217 into the nucleus, mainly the nucleolus, suggesting that the RNA binding might be  
218 responsible for YBX1 retention in the cytoplasm (**Fig. 3 supplement 3A**). To test  
219 whether YBX1-F85A remained in a liquid-like state in cells, we performed FRAP  
220 experiments (**Fig. 3 supplement 3C and 3D**). Nearly 90% of the fluorescence signal  
221 was recovered within 30 sec after photobleaching, suggesting that YBX1-F85A is highly  
222 dynamic in cells. We further found that F85A did not affect YBX1 phase separation *in*  
223 *vitro* (**Fig. 3 supplement 3B**).

224

### 225 **IDR-driven YBX1 phase separation is required for sorting YBX1 into exosomes**

226 Exosomes are produced by intraluminal vesicle budding from the limiting  
227 membrane of MVBs. We devised a method to visualize the delivery of YBX1 to the  
228 lumen of MVBs. Enlarged endosomes are observed in cells overexpressing a  
229 constitutively active mutant mCherry-Rab5<sup>Q79L</sup> (Baietti et al., 2012). Confocal  
230 microscopy revealed that the exosome marker CD63 but not EGFP filled the lumen or  
231 uniformly distributed over the rim of enlarged endosomes that were encircled by  
232 mCherry-Rab5<sup>Q79L</sup> (**Fig. 4A**). We also observed a marked accumulation of YFP-YBX1  
233 in the lumen of enlarged endosomes (**Fig. 4B**). In contrast, the RNA-binding defective  
234 YBX1 mutant (F85A) and phase separation defective mutants (CTD-Y to S, CTD-RK to  
235 G) did not appear in the lumen of ILVs within enlarged endosomes (**Fig. 4 supplement**

236 **1A)**, implying the requirement for phase separation and RNA binding in the  
237 incorporation of YBX1 into ILVs.

238 In Shurtleff et al (2016), we documented that YBX1 co-purified with CD63-  
239 positive EVs secreted from HEK293T cells. In subsequent work by Temoche-Diaz et al  
240 (2019), we showed that CD63 defines a distinct pool of high buoyant density vesicles  
241 corresponding to exosomes. To test the presence of YBX1 in EVs from cultured U2OS  
242 cells, we examined the fractionation of extracellular YBX1 by differential centrifugation  
243 and found by immunoblot that endogenous YBX1 co-sedimented with multiple EV  
244 markers (**Fig. 4C**). Overexpression of YFP-YBX1 in  $\Delta$ YBX1 cells enhanced the  
245 secretion of sedimentable YBX1 (**Fig. 4C**). Five-fold more YFP-YBX1 was detected in  
246 the sediment of culture medium from cells overexpressing wt compared to F85A mutant  
247 YBX1 fusion protein. IDR defective YBX1 mutant proteins (CTD-Y to S, CTD-RK to  
248 G) were less efficiently packaged than wt YBX1 into extracellular vesicles (**Fig. 4D**). To  
249 confirm that YBX1 resided inside the lumen of extracellular vesicles, we performed  
250 proteinase K protection assays on membranes in the high-speed pellet fraction. As **Fig.**  
251 **4E** shows, endogenous YBX1 was protected from proteinase K digestion in the absence  
252 but not in the presence of Triton X-100. ALIX, a cytosolic protein within exosomes, and  
253 Flotillin-2, a membrane protein anchored to the inner leaflet of EVs, served as positive  
254 controls that were also degraded only in the presence of detergent. CD9, a multi (putative  
255 four)-transmembrane protein with an extracellular loop recognized by CD9 antibody, was  
256 vulnerable to degradation independent of detergent. Similarly, YFP-tagged YBX1 from a  
257 high-speed pellet fraction was mostly resistant to proteinase K (**Fig. 4F**). These results  
258 confirmed that YBX1 was packaged into exosomes secreted from U2OS cells. In  
259 contrast, the RNA-binding defective YBX1 mutant F85A and IDR defective mutants (Y  
260 to S and RK to G) were significantly decreased in high-speed pellet fractions (**Fig. 4C**  
261 **and 4D**)

262 Cells overexpressing YFP-YBX1 were used for further purification of EVs by  
263 buoyant density flotation (**Fig. 4G**). Isolated vesicles from U2OS averaged around 130  
264 nm in diameter as determined by nanoparticle tracking analysis (NTA) (**Fig. 4H**, vesicles  
265 from HEK293T cells averaged around 100 nm in diameter, **Fig. 4 supplement 1B**).  
266 Vesicles examined by negative stain electron microscopy displayed a characteristic cup-

267 shape (**Fig. 4 supplement 1C**). YFP-YBX1 was detected in the buoyant vesicle fraction  
268 from  $\Delta$ YBX1/YFP-YBX1 cells but not from  $\Delta$ YBX1 cells (**Fig. 4I**). Further separation  
269 of these vesicles was achieved on a linear iodixanol gradient (5-25%) which resolved two  
270 distinct EV species: low density (LD) and high density (HD) sub-populations, as we  
271 previously reported for EVs from MDA-MB-231 cells (Temoche-Diaz et al., 2019) (**Fig.**  
272 **4J and 4K**). The YBX1 signal was detected in the combined HD vesicles which  
273 coincided with the exosome markers CD63 and ALIX (**Fig. 4K**). Approximately 10-fold  
274 more YFP-YBX1 than YFP-YBX F85A mutant protein was detected in the HD vesicle  
275 fractions normalized to CD9 content in each (**Fig. 4K**). These data illustrate that YBX1  
276 sorting into exosomes is dependent on both binding to RNA and IDR-driven phase  
277 separation.

278

### 279 **IDR-driven YBX1 phase separation is required for sorting miRNA into exosomes**

280 To test whether YBX1 condensation correlated with exosomal RNA sorting in cells, we  
281 reexamined the YBX1-dependent enrichment of miR-223 in exosomes purified by  
282 buoyant density flotation, as described in **Fig. 4G**, from two different cell lines,  
283 HEK293T and U2OS. As before, we found that miR-223 and miR-144 were  
284 significantly enriched whereas cytoplasmic miR-190 was not enriched in purified  
285 exosomes compared to cells (**Fig. 5A**) (Shurtleff et al. 2016). Overexpression of YBX1  
286 increased the relative miR-223 level in exosomes in both cell lines (**Fig. 5B**). To confirm  
287 the requirement of YBX1 in sorting miR-223 into exosomes, we generated a YBX1  
288 knockout HEK293T cell line with CRISPR/Cas9. YBX1 knockout clones ( $\Delta$ YBX1-9,  
289 and  $\Delta$ YBX1-41) were confirmed by Sanger sequencing for target DNA (**Fig. 5**  
290 **supplement 1A**), RT-qPCR for mRNA (**Fig. 5 supplement 1B**) and immunoblot for  
291 YBX1 protein (**Fig. 5C**). A similar knockout was made with U2OS cells (Lyons et al.,  
292 2016). We used RT-qPCR to quantify miR-223 levels in cells and exosomes, purified as  
293 described in **Fig. 4G**. MiR-223 secretion into the growth medium and in isolated  
294 exosomes was reduced  $\sim$  2-fold and correspondingly accumulated within  $\Delta$ YBX1 mutant  
295 derivatives of HEK293T and U2OS cells (**Fig. 5D and Fig. 5 supplement 1C**). Finally,  
296 to test the role of the YBX1 RNA-binding CSD and the CTD in sorting of miR-223 into  
297 exosomes, we overexpressed YBX1-F85A, YBX1-Y to S and YBX1-RK to G mutants in

298  $\Delta$ YBX1 U2OS cells and found similar miR-223 reductions in exosomes and  
299 accumulation within cells in all three mutant lines (**Fig. 5E**). Similar results were seen  
300 for secretion of miR-223 into the medium fraction of  $\Delta$ YBX1 mutant 293T cells  
301 overexpressing CTD mutants of YBX1 (**Fig. 5 supplement 1D**). These results suggest  
302 that YBX1 RNA binding and condensation help to recruit miR-223 for sorting into  
303 exosomes.

304 To test whether RNA regulates the phase behavior of YBX1, we performed a  
305 phase separation assay with recombinant mGFP-YBX1 in the presence of total RNA  
306 isolated from U2OS cells. We mixed increasing quantities of RNA with a fixed  
307 concentration of YBX1 and imaged the resulting droplets. Consistent with a previous  
308 report on prion-like RNA binding protein FUS (Maharana et al., 2018), we found that  
309 increasing the RNA/YBX1 ratio initially promoted liquid droplet size until a point where  
310 droplets were less stable or were not produced (**Fig. 6 supplement 1A**).

311 Given the cellular function of YBX1 involves sorting miR-223 into exosomes, we  
312 examined miR-223 capture into YBX1 droplets. Cy5( 5') labeled miR-223 was  
313 incubated with mGFP-YBX1 under phase separation conditions and observed by  
314 fluorescence microscopy. As shown in **Fig. 6A**, miR-223 accumulated in liquid-like  
315 droplets coincident with YBX1.

316 We sought to identify the domains of YBX1 that contribute to the recruitment of  
317 miR-223. Cy5( 5') labeled miR-223 was mixed with different YBX1 variants as shown  
318 in **Fig. 6B**. Disrupting the association of YBX1 and miRNA through mutation of Phe85  
319 to Ala had no effect on YBX1 droplet formation, but almost completely blocked miR-223  
320 recruitment (**Fig. 6B and 6C**). The YBX1-CTD-Y to S mutant greatly reduced the  
321 formation of droplets but those that formed recruited miR-223 at a similarly reduced level  
322 (**Fig. 6B and 6C**). miR-223 condensation was not detected when YBX1 phase separation  
323 was completely blocked in the YBX1-CTD-RK to G mutant (**Fig. 6B and 6C**). These  
324 data suggest that YBX1 recruits miR-223 through direct interaction with the central, cold  
325 shock domain, and into condensates governed by the C-terminal domain.

326

327 **YBX1 condensates recruit miRNAs and sort them into exosomes with selectivity**

328 To examine whether YBX1 recruits miRNAs with selectivity, we analyzed two  
329 additional miRNAs: miR-190, an abundant cellular miRNA and miR-144, one that is  
330 highly enriched in exosomes (Shurtleff et al., 2016). We first incubated 5'Cy5 labeled  
331 miR-223, miR-190 and miR-144 with mGFP-YBX1 independently. Incubations were  
332 conducted in the presence of an excess of unlabeled RNA (10 ng/ul total RNA was  
333 extracted from U2OS cells) which produced a clear discrimination between miR-223  
334 which partitioned well into YBX1 condensates from miR-190 and miR-144, which did  
335 not (**Fig. 6D and 6E**). The addition of unlabeled excess RNA produced enlarged YBX1  
336 droplets (**Fig. 6 supplement 2A**). At a fixed concentration of 7.5uM YBX1 and 100nM  
337 miRNA but without unlabeled excess RNA, both miR-223 and miR-190 partitioned into  
338 YBX1 droplets-(**Fig. 6 supplement 2B and 2C**). However at varied concentrations of  
339 miRNA, the partition coefficient for miR-223 into YBX1 droplets was higher than miR-  
340 190 while the partition coefficients for YBX1 were almost same (**Fig. 6 supplement 2C**).  
341 Additional tests of selectivity were conducted in the presence of unlabeled cellular RNA.

342 Unlike miR-190, miR-144 was detected enriched in EVs and dependent on YBX1  
343 for secretion from HEK293T cells (Shurtleff et al., 2016). Nonetheless, miR-144 was not  
344 recruited in YBX1 droplets (**Fig. 6D and 6E**). In an independent assay, we evaluated the  
345 interaction of YBX1 with three miRNAs by co-immunoprecipitation from HEK293T cell  
346 lysates. These results were consistent with the capture or not of these miRNAs in YBX1  
347 condensates with nearly quantitative co-precipitation of YBX1 and miR-223 but 5-10-  
348 fold lower co-precipitation of miR-190 and miR-144 from cell lysates (**Fig. 6F**). We next  
349 assessed miRNA partition into the phase separation defective mutants YBX1-CTD-Y to  
350 S and YBX1-CTD-RK to G (**Fig. 6G, 6H and 6I**). The Y to S mutant produced less  
351 condensate at the same protein concentration and was somewhat less discriminatory and  
352 the RK-G mutant produced no visible condensate of protein or RNA. Although the  
353 results of these two experiments were consistent, the requirement of YBX1 for secretion  
354 of miR-144 in cells was not reflected in a requirement for capture by pure YBX1 protein  
355 in condensates.

356 In our previous work, we evaluated the requirement for YBX1 in the secretion of  
357 miR-223 and miR-144 by assaying samples of the culture medium in which HEK293T  
358 cells were grown. We sought to refine this measurement by quantifying the miRNA  
359 content of buoyant vesicles secreted in the culture medium as we did for the experiment  
360 in **Fig. 5D**. As shown in **Fig. 5A**, among these three miRNAs, miR-223 and miR-144 but  
361 not miR-190 were enriched to different extents in exosomes secreted by HEK293T and  
362 U2OS cells. Sorting of miR-223 but not miR-190 and miR-144 into exosomes was  
363 decreased in  $\Delta$ YBX1 cells (**Fig. 6J**). Combined with the other results of our current work,  
364 we conclude, as before, that YBX1 enhances the secretion of miR-223 in EVs but that  
365 miR-144, though enriched in EVs, does not engage YBX1 condensates and is not  
366 required for secretion in EVs. It seems likely that another RBP is responsible for sorting  
367 of miR-144 into exosomes.

368

### 369 **Condensation of YBX1 into P-bodies is required for sorting miRNAs into exosomes**

370 YBX1 was previously suggested to be a component of P-bodies that form foci  
371 together with Dcp1a as visualized by fluorescence microscopy (Yang and Bloch, 2007).  
372 We observed endogenous YBX1 colocalized with P-body components, EDC4, Dcp1a and  
373 DDX6, as visualized by specific antibodies (**Fig. 7A and 7B**). To address the role of  
374 condensation in the incorporation of YBX1 in P-bodies, we analyzed the co-localization  
375 of IDR mutants with EDC4. Both YBX1-CTD-Y to S and YBX1-CTD-RK to G mutants  
376 largely eliminated YBX1 condensation (**Fig. 7C**).

377 To further study the association of YBX1 and P-bodies, we performed affinity  
378 purification coupled with mass spectrometry analysis of N-terminally EGFP-tagged or  
379 3xFlag-tagged YBX1. Comparing positive hits found with both tagged forms of YBX1  
380 immunoprecipitation trials, we generated a proteome of potential YBX1 interactors and  
381 compared this with a published P-body proteome (Hubstenberger et al., 2017) (**Table 1**,  
382 **Fig. 7D**). About 35% (43/125) of P-body proteins were identified as potential YBX1  
383 binding partners. Gene Ontology analysis showed that RNA-binding proteins were  
384 enriched in the YBX1 interactome (**Fig. 7E**). Some of the RNA-binding proteins, such as  
385 SYNCRIP and SSB (Lupus La protein), were identified previously for roles in sorting

386 miRNAs into exosomes (Santangelo et al., 2016; Temoche-Diaz et al., 2019). We  
387 observed that SYNCRIP formed condensates and co-localized with YBX1 (**Fig. 7**  
388 **supplement 1A**) in cells, implying that the condensation properties might be shared by  
389 other RBPs that are involved in exosomal RNA sorting. The potential YBX1 interactors  
390 included components of the miRNA processing pathway, MOV10 and Ago2, and well-  
391 known P-body markers, DDX6 and EDC4 (**Fig. 7F**).

392 DDX6, a DEAD box helicase, plays a key role in P-body assembly, and interacts  
393 with almost half of P-body proteins (Hubstenberger et al., 2017). Yeast Dhh1 (human  
394 DDX6) undergoes LLPS *in vitro* and controls processing body dynamics *in vivo* through  
395 its RNA-stimulated ATPase activity (Mugler et al., 2016). Using co-  
396 immunoprecipitation, we found that wild type but not condensation-defective mutant  
397 forms of YBX1 interacted with DDX6 (**Fig. 7G and 7H**). Correspondingly, we found  
398 that DDX6 was sorted into the luminal interior of isolated EVs as judged by buoyant  
399 density fractionation and a proteinase k protection assay (**Fig. 7I**). To extend this  
400 analysis, we purified EVs from HEK293T cells by buoyant density flotation as described  
401 in **Fig. 4G** and conducted a proteomic analysis using liquid chromatography tandem mass  
402 spectrometry (LC-MS/MS) (**Table 2**). Compared with the published P-body proteome,  
403 we found that 18.4% (23/125) of P-body proteins were identified in exosomes (**Fig. 7J**  
404 **and Table 2**). Thus, there may be a role for P-bodies in the concentrative capture of  
405 proteins destined for secretion in EVs.

406

## 407 **Discussion**

408 Several RNA-binding proteins (RBPs) involved in the sorting of miRNAs into  
409 exosomes secreted by mammalian cells share a sequence domain, the IDR, implicated in  
410 the association of RNA and proteins in membraneless organelles such as P-bodies (Lee et  
411 al., 2020; Luo et al., 2018; Santangelo et al., 2016; Shurtleff et al., 2016; Temoche-Diaz  
412 et al., 2019; Xing et al., 2020). We previously reported roles for the YBX1 protein in  
413 sorting and secretion of miR-223 in HEK293T cells and the Lupus La protein in secretion  
414 of miR-122 in MDA-MB-231 cells. Both proteins contain such IDR domains, and at least  
415 one, the La protein, appears to be organized in puncta in the cytoplasm of MDA-MB-231

416 cells (Shurtleff et al, 2016; Temoche-Diaz et al., 2019). Here we report that pure YBX1  
417 forms a liquid-like condensate and similarly associates with P-bodies in cells including in  
418 apparent association with other bona fide constituents of P-bodies such as the DDX6  
419 protein. YBX1 also contains an RNA binding domain, the CSD, which together with the  
420 IDR is required for sorting of miR-223 into exosomes secreted by cells and for the  
421 species-selective concentration of miR-223 into condensates *in vitro*. We report a  
422 previously unrecognized connection between proteins such as YBX1 and DDX6 that  
423 associate in P-bodies and are also secreted in exosomes. Thus, we speculate that the P-  
424 bodies may house miRNA and other small RNAs prior to their capture into membrane  
425 invaginations and intraluminal vesicles of the multivesicular body (MVB). Fusion of the  
426 MVB at lysosome would then subject the ILVs and their condensate content to  
427 degradation. Fusion of the MVB at the cell surface would result in the extracellular  
428 discharge of exosomes for uptake into other cells.

429         Several other RBPs have been reported to play a role in the sorting and secretion  
430 of miRNAs in exosomes. These include hnRNPA2B1 (Villarroya-Beltri et al., 2013),  
431 SYNCRIP (Hobor et al., 2018; Santangelo et al., 2016), HuR (Mukherjee et al., 2016),  
432 and the major vault protein (MVP) (Statello et al., 2018; Teng et al., 2017), one of which,  
433 SYNCRIP, contains an IDR domain and associates with YBX1 in P-bodies (**Fig. 7**  
434 **supplement 1A**). Other groups have developed evidence for post-translational  
435 modifications of RBPs that may influence their localization in cells. Sumoylation,  
436 uridylation and ubiquitylation of RBPs have been implicated in the selection of miRNA  
437 cargo for secretion in EVs (Koppers-Lalic et al., 2014; Villarroya-Beltri et al., 2013). The  
438 secretion of YBX1 in EVs, for example, has been shown to depend on ubiquitylation  
439 (Palicharla and Maddika, 2015). The relationship between these modifications and the  
440 capture of miRNAs into invaginations that form on an endosome remains to be explored.  
441 On possible connection is in the role of post-translational modifications such as  
442 phosphorylation, methylation and ubiquitylation of IDRs where the phase transition  
443 properties are altered by changes in charge, hydrophobicity size and structure (Owen and  
444 Shewmaker, 2019). Such modifications may reversibly control the partition of RBPs and  
445 cargo into RNA granules and subsequently into vesicles budding into the endosome.

446



447 Of the two IDRs in YBX1, only the one located in the C-terminal domain appears  
448 to influence the phase condensation properties of the protein. Within the C-terminal IDR,  
449 we identified Y, R and K residues that contribute to LLPS. As shown for prion-like RNA  
450 binding properties, we suggest that phase separation of YBX1 is governed by interactions  
451 between Y and R residues (Wang et al., 2018). RNA-binding through an interaction with  
452 the CSD domain of YBX1 appears to reinforce phase separation producing larger  
453 droplets at an optimum ratio of RNA/protein (**Fig.6 supplement 1A**).

454 Our observation of a connection between P-bodies and RBPs engaged in sorting  
455 of miRNAs for secretion in exosomes may relate the two organelles by function. P-bodies  
456 are thought to function in mRNA storage or decay. Although exosomes have some small  
457 mRNAs, the average length of RNAs in the range of 100nt favors smaller species such as  
458 tRNA, Y-RNA, vault RNA and miRNAs. If P-bodies or other RNA granules serve to  
459 condense these small RNAs for secretion in exosomes, there would have to be some  
460 segregation of species with respect to size and perhaps function. Furthermore, P-bodies  
461 are larger than the typical exosome (~500nm vs 30-150nm) (Hubstenberger et al., 2017),  
462 thus the sorting of small RNA cargo for secretion may occur in only a subset of smaller P  
463 bodies or by a physical segregation of a domain of the P body by tubulation or budding  
464 into an invagination into the endosome. A further speculative connection relates to the  
465 localization of miRNA processing components, such as Ago2 (Gibbings et al., 2009;  
466 Siomi and Siomi, 2009), on the surface of endosomes and on our observation of a  
467 physical contact between YBX1 and Ago2 and MOV10 (**Fig. 7F**). Nonetheless, as we  
468 consistently find Ago2 not localized within exosomes (Shurtleff et al, 2016 and  
469 Temoche-Dizaz et al, 2019), there must be some sorting of YBX1 from other P body  
470 content in the capture of proteins and RNA segregated into membrane buds invaginating  
471 into the endosome. We suggest that molecules destined for secretion in exosomes are  
472 segregated in a two-step process involving partition into a precursor larger RNA granule  
473 or into RNA granules of distinct function followed by sorting from or among granules to  
474 capture those molecules fated for secretion in exosomes and capture by target cells into  
475 which exosomes are internalized (**Fig. 8**).

476

## 477 **Materials and methods**

### 478 **Key resources table**

479

| REAGENT or RESOURCE                                       | SOURCE                                                                                                         | IDENTIFIER                                                                                                          |
|-----------------------------------------------------------|----------------------------------------------------------------------------------------------------------------|---------------------------------------------------------------------------------------------------------------------|
| Experimental Models: Cell lines                           |                                                                                                                |                                                                                                                     |
| Human U-2 OS cells                                        | Gift of Dr. Pavel Ivanov lab                                                                                   | N/A                                                                                                                 |
| Human U-2 OS $\Delta$ YBX1 cells                          | Gift of Dr. Pavel Ivanov lab                                                                                   | N/A                                                                                                                 |
| Human HEK293T cells                                       | Cell culture facility at UC Berkeley                                                                           | N/A                                                                                                                 |
| Human HEK293T $\Delta$ YBX1 cells                         | This study                                                                                                     | N/A                                                                                                                 |
| Sf9 cells                                                 | Cell culture facility at UC Berkeley                                                                           | N/A                                                                                                                 |
| Recombinant DNA                                           |                                                                                                                |                                                                                                                     |
| mCherry-Rab5CA(Q79L)                                      | Addgene                                                                                                        | #35138                                                                                                              |
| EGFP-YBX1                                                 | This study                                                                                                     | N/A                                                                                                                 |
| 3xFlag-YBX1                                               | This study                                                                                                     | N/A                                                                                                                 |
| YFP-YBX1                                                  | This study                                                                                                     | N/A                                                                                                                 |
| YFP-YBX1-F85A                                             | This study                                                                                                     | N/A                                                                                                                 |
| YFP-YBX1-(128-324)-Y to S/A                               | This study                                                                                                     | N/A                                                                                                                 |
| YFP-YBX1-(128-324)-RK to G                                | This study                                                                                                     | N/A                                                                                                                 |
| YFP-YBX1-(128-324)-QN to G/A                              | This study                                                                                                     | N/A                                                                                                                 |
| YFP-YBX1-(128-324)-DE to G                                | This study                                                                                                     | N/A                                                                                                                 |
| YFP-YBX1-(128-324)-VMF to A                               | This study                                                                                                     | N/A                                                                                                                 |
| YFP-YBX1- $\Delta$ (1-55)                                 | This study                                                                                                     | N/A                                                                                                                 |
| YFP-YBX1- $\Delta$ (56-127)                               | This study                                                                                                     | N/A                                                                                                                 |
| YFP-YBX1- $\Delta$ (1-127)                                | This study                                                                                                     | N/A                                                                                                                 |
| YFP-YBX1- $\Delta$ (56-324)                               | This study                                                                                                     | N/A                                                                                                                 |
| YFP-YBX1- (56-127)                                        | This study                                                                                                     | N/A                                                                                                                 |
| YFP-YBX1- $\Delta$ (128-324)                              | This study                                                                                                     | N/A                                                                                                                 |
| His6-MBP-3C-mGFP-TEV-NotI-ccdB-AscI-stop-HindIII cassette | Gift of Dr. Anthony A. Hyman lab                                                                               | N/A                                                                                                                 |
| His6-MBP-mGFP-YBX1                                        | This study                                                                                                     | N/A                                                                                                                 |
| His6-MBP-mGFP-YBX1-F85A                                   | This study                                                                                                     | N/A                                                                                                                 |
| His6-MBP-mGFP-YBX1-(128-324)-Y to S                       | This study                                                                                                     | N/A                                                                                                                 |
| His6-MBP-mGFP-YBX1-(128-324)-RK to G                      | This study                                                                                                     | N/A                                                                                                                 |
| His6-MBP-mGFP-YBX1- $\Delta$ (128-324)                    | This study                                                                                                     | N/A                                                                                                                 |
| His6-MBP-mGFP-YBX1- $\Delta$ (1-127)                      | This study                                                                                                     | N/A                                                                                                                 |
| pX330-Venus                                               | Gift of Dr. Robert Tjian lab                                                                                   | N/A                                                                                                                 |
| Software and Algorithms                                   |                                                                                                                |                                                                                                                     |
| Fiji                                                      | NIH                                                                                                            | <a href="https://fiji.sc/">https://fiji.sc/</a>                                                                     |
| Prism 8 for macOS                                         | Graphpad                                                                                                       | <a href="https://www.graphpad.com">https://www.graphpad.com</a>                                                     |
| IUPred                                                    | Dosztanyi et al., 2005                                                                                         | <a href="https://iupred2a.elte.hu">https://iupred2a.elte.hu</a>                                                     |
| Sigmaplot 12.5                                            | Systat Software                                                                                                | <a href="http://www.sigmaplot.co.uk">http://www.sigmaplot.co.uk</a>                                                 |
| NCPR                                                      | Alan Bleasby European Bioinformatics Institute, Wellcome. Trust Genome Campus, Hinxton, Cambridge CB10 1SD, UK | <a href="http://www.bioinformatics.nl/cgi-bin/emboss/charge">http://www.bioinformatics.nl/cgi-bin/emboss/charge</a> |

480

481

482 **Cell lines and cell culture**

483 Human HEK293T cells and human osteosarcoma cell lines U2OS were obtained from the  
484 UC-Berkeley Cell Culture Facility and were confirmed by short tandem repeat profiling  
485 (STR) and tested negative for mycoplasma contamination. Cells were grown in  
486 monolayer cultures at 37°C in 5% CO<sub>2</sub> and maintained in Dulbecco's modified Eagle's  
487 medium (DMEM) supplemented with 10% fetal bovine serum (FBS, Thermo Fisher  
488 Scientific, Waltham, MA). For EV production, we seeded cells at ~30% confluency in  
489 exosome-depleted medium that was obtained either by ultracentrifugation of DMEM plus  
490 10% FBS or DMEM supplemented with 10% exosome-depleted FBS (System  
491 Biosciences, Palo Alto, CA) in 150 mm CellBIND tissue culture dishes (Corning,  
492 Corning NY). EVs were collected when cells reached approximately 80% confluency  
493 (~48h). For characterization of miRNA sorting into exosomes, cells grown to ~70%  
494 confluency in DMEM with 10% FBS medium and shifted into exosome-depleted  
495 medium. EVs were collected after 24 h.

496 **Extracellular vesicle purification**

497 Conditioned medium (about 420 ml) was harvested from HEK293T or U2OS cultured  
498 cells at 80% confluency. All the following manipulations were performed at 4°C. Cells  
499 and large debris were removed by centrifugation at 1500xg for 20 min in a Sorvall R6+  
500 centrifuge (Thermo Fisher Scientific) followed by 10,000xg for 20 min in 500 ml vessels  
501 using a fixed angle FIBERlite F14-6 x 500y rotor (Thermo Fisher Scientific). The  
502 supernatant fraction was then centrifuged onto a 60% sucrose cushion in buffer A (10  
503 mM HEPES pH 7.4, 0.85% w/v NaCl) at ~ 100,000xg (28,000 rpm) for 1.5 h using SW  
504 32 Ti swinging-bucket rotors. The interface on the sucrose cushion was collected and  
505 pooled from three tubes and applied onto a 60% sucrose cushion for an additional  
506 centrifugation at ~ 120,000xg (31,500 rpm) in a SW 41 Ti swinging-bucket rotor for 16  
507 h. The sucrose concentration of the collection from the first sucrose cushion interface was  
508 measured by refractometry and was adjusted to a concentration <20%. Higher  
509 concentrations of sucrose impede sedimentation because EVs equilibrate at a buoyant  
510 density above that level. For purification, EV subpopulations that resolve at distinct  
511 buoyant densities in a linear gradient were collected and mixed with 60% sucrose to a  
512 final volume of 4 ml (sucrose final concentration is ~ 48%). Layers of 1.5 ml of 25%,

513 20%, 15%, 10%, and 5% iodixanol (Optiprep) solution in buffer A were sequentially  
514 overlaid and samples were centrifugated at ~ 150, 000xg (36,500 rpm) for 16 h in a SW  
515 41 Ti rotor. Fractions (400 ul for each) from top to bottom were collected and mixed with  
516 SDS sample buffer for immunoblot analysis. In some cases, such as in the immunoblot of  
517 YBX1, the floated fractions corresponding to the high density from 1.13 to 1.15 g/ml  
518 were pooled and concentrated by centrifugation to improve detection by immunoblot.  
519

520 For EV purification in bulk (without discriminating among EV sub-populations), the first  
521 cushion-sedimented vesicles above were collected and mixed with 60% sucrose to a final  
522 volume of 8 ml. At this point it was important to keep the sucrose concentration > 50%.  
523 Aliquots (3 ml) of 40%, (1.5 ml)10% sucrose buffer were sequentially overlaid and the  
524 tubes were centrifuged at ~ 150, 000xg (36,500 rpm) for 16 h in a SW 41 Ti swinging-  
525 bucket rotor. The 10/40% interface was collected and used either directly for RNA  
526 extraction by a mirVana miRNA isolation kit (Thermo Fischer Scientific) or washed with  
527 PBS and concentrated by centrifugation at ~ 120, 000xg in a SW 55 Ti rotor for 70min.  
528 Samples were then prepared for immunoblot analysis.

529

530 For proteinase K protection assays, the supernatant fraction from 10,000xg of  
531 conditioned medium was centrifuged at 100,000xg (28,000 rpm) for 1.5 h using SW 32  
532 Ti rotors. Pellet fractions resuspended in PBS were pooled and centrifuged at ~ 150,  
533 000xg (36,500 rpm) for 70min in a SW 55 Ti rotor. The pellet was resuspended in PBS  
534 and split into four equal aliquots. One sample was left untreated, another sample was  
535 treated with 0.5% Triton X-100, the third sample was treated with 5 ug/ml proteinase K  
536 on ice for 20 min, and the last one was mixed with 0.5% Triton X-100 prior to proteinase  
537 K treatment. Proteinase K was inactivated with 5 mM phenylmethane sulfonyl fluoride  
538 (PMSF) on ice for 5 min and samples were then mixed with SDS sample loading buffer  
539 for immunoblot analysis.

#### 540 **Nanoparticle tracking analysis**

541 Extracellular vesicles purified by buoyant density centrifugation were diluted 1:100 with  
542 PBS filtered with a 0.02 um filter (What GmbH, Dassel, Germany). The liquid was drawn  
543 into a 1 ml syringe and inserted into a Nanosight LM10 instrument equipped with a 405-

544 nM laser (Malvern, UK). Particles were tracked for 60 s at a constant flow rate of 50  
545 using Nanosight nanoparticle tracking analysis software (Nanosight NTA 3.1 software,  
546 Malvern Instruments). Each sample was analyzed five times and the counts were  
547 averaged.

#### 548 **Negative staining and visualization of exosomes by electron microscopy**

549 Formvar/Carbon Coated - Copper 300 mesh grids (Electron Microscopy Sciences,  
550 Hatfield, PA) were glow discharged for 10 s. An aliquot of exosomes (5 ul) isolated from  
551 the 10/40% interface of the sucrose flotation gradient was spread onto a freshly glow-  
552 discharged grid. The grid was quickly washed on three droplets of water to dilute the  
553 sucrose and then stained with 1% uranyl acetate for 2 min. Excess staining solution was  
554 removed with Whatman® Grade 1 filter paper. Post drying, grids were imaged at 120 kV  
555 using a Tecnai-12 Transmission Electron Microscope (FEI, Hillsboro, OR) in the  
556 Electron Microscopy Laboratory at UC Berkeley.

#### 557 **Quantitative real-time PCR**

558 RNA was extracted using either Direct-zol RNA Miniprep kits (Zymo Research) or a  
559 mirVana miRNA isolation kit (Thermo Fisher Scientific) according to the manufacturer's  
560 instructions. Taqman miRNA assays, purchased from Life Technologies (assay number:  
561 has-mir-223-3p:000526, has-mir-190-5p:000489 and has-mir-144-3p:002676), were  
562 performed to quantify miRNAs. We used total RNA from cells or exosomes for  
563 normalization as there is no well-accepted control transcript for exosomes. Total RNA  
564 from cells was quantified by nanodrop and total RNA from exosomes was quantified  
565 using an RNA bioanalyzer (Agilent). Typically, 10 ng total RNA from cells and 2 ng  
566 total RNA from exosomes was reverse transcribed. Taqman qPCR master mix with no  
567 amperase UNG was used for real-time PCR and reactions were performed on an ABI-  
568 7900 real-time PCR system (Life Technologies). For all RT-PCR reactions, the results  
569 are presented as mean cycle threshold (Ct) values of three independent technical  
570 replicates. Samples with a Ct value greater than 40 were regarded as negative.

#### 571 **Measurement of miR-223 secretion**

572 An equal number of cells for indicated cell lines were seeded at 50% confluency for one  
573 day and changed into exosome-depleted media on the second day for the next 24 h.  
574 During this time, 200 ul medium was collected at 2, 6, 12 and 24 h time points and

575 centrifuged at 1500 xg for 15 min to remove cellular debris. RNA was extracted using the  
576 Direct-zol RNA Miniprep kits (Zymo Research) and analyzed by Taqman miRNA qPCR  
577 assay.

#### 578 **Immunoblots**

579 After washing cells with cold PBS, total cell extracts were isolated in RIPA buffer (50  
580 mM Tris-HCL PH 7.5, 150 mM NaCl, 2 mM EDTA, 1% Triton X-100) containing a  
581 protease inhibitor cocktail (1mM 4-aminobenzamidine dihydrochloride, 1 mg/ml antipain  
582 dihydrochloride, 1 mg/ml aprotinin, 1 mg/ml leupeptin, 1 mg/ml chymostatin, 1 mM  
583 phenylmethylsulfonyl fluoride, 50 mM N-tosyl-L-phenylalanine chloromethyl ketone and  
584 1 mg/ml pepstatin). Typically, around 30-50 ul of RIPA buffer with inhibitor was added  
585 per  $1 \times 10^6$  cells. Protein was quantified using a BCA Protein Assay Kit (Thermo Fisher  
586 Scientific) and appropriate amounts of cell lysate were mixed with SDS sample loading  
587 buffer. Samples were heated at 95 °C for 10 min and separated on 4–20% acrylamide Tris-  
588 glycine gradient gels (Life Technologies). Proteins were transferred to PVDF membranes  
589 (EMD Millipore, Darmstadt, Germany), blocked with 5% bovine serum albumin in  
590 TBST, and incubated for either 2 h at room temperature or overnight at 4 °C with primary  
591 antibodies. Blots were then washed with TBST, incubated with anti-rabbit or anti-mouse  
592 secondary antibodies (GE Healthcare Life Sciences, Pittsburgh, PA) and detected with  
593 ECL-2 reagent (Thermo Fisher Scientific). Primary antibodies used in this study were as  
594 follows: anti-YBX1 (Cell Signaling Technology, Danvers, MA, #4202); anti-YBX1  
595 (Abcam, Cambridge, MA, ab12148); anti-CD9 (Cell Signaling Technology, Danvers,  
596 MA, #13174S); anti-ALIX (Santa Cruz Biotechnology, CA, Sc-53540); anti-flotillin-2  
597 (BD Biosciences, San Jose, CA, #610383); anti-CD63 (Abcam, Cambridge, MA,  
598 ab134045); anti-CD63 (Fisher Scientific, BDB556019, #H5C6); anti-Actin (Abcam,  
599 Cambridge, MA, ab8224); anti-DDX6 (Bethyl Laboratories, Inc, A300-471A); anti-  
600 EDC4 (Santa Cruz Biotechnology, CA, Sc-376382); anti-G3BP1 (Santa Cruz  
601 Biotechnology, CA, Sc-81940); anti-GFP (Torrey Pines Biolabs, Inc, Houston, TX,  
602 TP401); anti-GFP (Santa Cruz Biotechnology, CA, Sc-9996); anti-GM130 (BD  
603 Biosciences, 610823); anti-Flag (Sigma, St. Louis, MO, F9291).

#### 604 **Immunoprecipitation of YBX1-miRNA complexes**

605 Immunoprecipitation of YBX1-miRNA complexes was performed as previously  
606 described (Temoche-Diaz et al., 2019). Briefly, about  $4 \times 10^7$  HEK293T cells expressing  
607 YFP-tagged YBX1 were harvested. Cells were homogenized in 2 volumes of HB buffer  
608 (20 mM HEPES pH7.4, 250 mM sorbitol) with protease inhibitor cocktail as described  
609 above and physically disrupted by 13-15 passes through a 22G needle until ~85% cell  
610 lysis was achieved as assessed by trypan blue staining. The homogenate was centrifuged  
611 at 1500xg for 20 min to remove unlysed cells and nuclei. The supernatant fraction was  
612 used as a source of cytoplasmic YBX1 for immunoprecipitation. GFP-Trap agarose beads  
613 (Chromotek) were washed three times in polysome lysis buffer (100 mM KCl, 5 mM  
614  $MgCl_2$ , 10 mM HEPES, pH 7.0, 0.5% Nonidet P-40, 1 mM DTT, 100 U/ ml RNasin  
615 RNase inhibitor (Promega, cat. no. N2511), 2 mM vanadyl ribonucleoside complex  
616 solution (Sigma-Aldrich (Fluka BioChemika), cat. no. 94742), 1x protease inhibitor  
617 cocktail). We used polysome lysis buffer as described to lyse cells; for washes this buffer  
618 was used without RNase and protease inhibitors. The 1500 xg post-nuclear supernatant  
619 was mixed with 5x polysome lysis buffer to a final 1x concentration. An aliquot (1/10) of  
620 the lysate was set aside as the input and the rest was incubated with 40 ul GFP-Trap  
621 beads with rotation for 3 h at 4 °C. Beads were washed five times with 1x polysome buffer  
622 and divided for protein or RNA analysis. Beads for protein analysis were incubated with  
623 SDS sample buffer and heated at 95 °C for 10 min and beads for RNA analysis were  
624 mixed with TRI reagent (Zymo Research) followed by RNA extraction using a Direct-zol  
625 RNA purification kits (Zymo Research). Proteins and miRNAs were analyzed by  
626 immunoblots and Taqman miRNA qPCR, respectively.

### 627 **Immunofluorescence**

628 U2OS cells on 12 mm coverslips (Corning) were washed by PBS once and fixed by 4%  
629 EM-grade paraformaldehyde (Electron Microscopy Science, Hatfield, PA) for 15 min at  
630 room temperature. Cells were then washed three time with PBS, blocked for 30 min in  
631 blocking buffer (5% FBS in PBS), and permeabilized in blocking buffer with 0.1%  
632 saponin for 20 min. Next, cells were incubated with either 1:50 or 1:100 dilution of  
633 primary antibodies for 1 h at room temperature, washed by PBS 3 times (10 min/time)  
634 and incubated in secondary antibodies with 1: 500 dilution for another 1 h at room  
635 temperature. Cells were extensively washed with PBS another 3 times (10 min/time) and

636 mounted on slides using Prolong Gold Antifade Reagent with DAPI (Thermo Fisher).  
637 Both primary and secondary antibodies were diluted in blocking buffer with 0.1%  
638 saponin. All the incubations were done in a humid light-tight box to prevent drying and  
639 fluorochrome fading. Primary antibody uses in the immunofluorescence studies were as  
640 follows: anti-YBX1 (Abcam, ab12148); anti-CD63 (Fisher Scientific, BDB556019,  
641 #H5C6); anti-DDX6 (Bethyl Laboratories, Inc, A300-471A); anti-EDC4 (Santa Cruz  
642 Biotechnology, Sc-376382); anti-Dcp1a (Santa Cruz Biotechnology, Sc-100706); anti-  
643 GFP (Torrey Pines Biolabs, TP401); anti-GFP (Santa Cruz Biotechnology, Sc-9996).  
644 Images were acquired with a Zeiss LSM710 confocal microscope equipped with an  
645 mCherry/GFP/DAPI filter set and 63X or 100X 1.4 NA objectives, and were analyzed  
646 with the Fiji software (<http://fiji.sc/Fiji>).

#### 647 **CRISPR/Cas9 genome editing**

648 A pX330-based plasmid expressing venus fluorescent protein (Shurtleff et al., 2016) was  
649 used to clone the gRNAs targeting YBX1. Two CRISPR guide RNAs targeting the first  
650 exon of the YBX1 open reading frame were designed following the CRISPR design  
651 website (<http://crispor.tefor.net/crispor.py>). gRNAs targeting the following sequences  
652 within YBX1: YBX1-gRNA1, agcgccgacaccaagcc, YBX1-gRNA2,  
653 atcgggcgcgctgccggcg; Oligonucleotides encoding gRNAs were annealed and cloned into  
654 pX330-Venus as described (Zhang Feng lab's protocol). HEK293T cells at a low passage  
655 number were transfected using Lipofectamine 2000 (Invitrogen) for 48 h, trypsin-treated  
656 and sorted for single, venus positive cells in 96 well plates using a BD influx cell sorter.  
657 Wells containing single clones (72 clones, 1-24 clones for YBX1-gRNA1, 25-48 clones  
658 for YBX1-gRNA2, 49-72 clones for YBX1-gRNA1 and gRNA2) were allowed to expand  
659 and YBX1 knockout candidates were confirmed by immunoblot. The YBX1 positive  
660 knockouts by immunoblot were clones 9, 31, 41, 54, 57, 58, 66, 67, 68 and 72. Clones 9  
661 and 41 were further verified by Sanger sequencing after Topo TA cloning the PCR  
662 products of the region around the gRNA recognition site. U2OS YBX1 knockout cells  
663 were generously provided by Dr. Pavel Ivanov (Lyons et al., 2016).

#### 664 **Constructs, protein expression and purification**

665 Plasmid information is listed in the key resources table. Maltose-binding protein hybrid  
666 genes were expressed and the fusion proteins were isolated from baculovirus-infected



667 SF9 insect cells (Lemaitre et al., 2019). Insect cell culture (1L) was harvested 48 h after  
668 viral infection and collected by centrifugation for 15 min at 2,000 rpm. The pellet  
669 fractions were resuspended in 35 ml lysis buffer (50 mM Tris-HCl 7.4, 1 M KCl, 5%  
670 glycerol, 5mM MgCl<sub>2</sub>, 0.5ul/ml Benzonase nuclease (sigma, 70746-3), 1 mM DTT, 1  
671 mM PMSF and 1x protease inhibitor cocktail). Cells were lysed by sonication and the  
672 crude lysate was clarified by centrifugation for 60 min at 20, 000 rpm at 4°C. After  
673 centrifugation, the supernatant fraction was incubated with 4 ml amylose resin (New  
674 England Biolabs, E8021L) for 1 h. Amylose resin samples were transferred to columns  
675 and protein-bound beads were washed with lysis buffer until no protein was eluted as  
676 monitored by the Bio-Rad protein assay (Bio-Rad, Catalog #5000006). Maltose-binding  
677 protein fusions were eluted with 12 ml elution buffer (50 mM Tris-HCl 7.4, 500 mM  
678 KCl, 5% glycerol, 50 mM maltose) and concentrated using an Amicon Ultra Centrifugal  
679 Filter Unit (50 kDa, 4ml) (Fisher Scientific, EMD Millipore). The protein was further  
680 purified by gel filtration chromatography (Superdex-200, GE Healthcare) with columns  
681 equilibrated in storage buffer (50 mM Tris-HCl 7.4, 500 mM KCl, 5% glycerol, 1 mM  
682 DTT). Peak fractions corresponding to the appropriate fusion protein were pooled,  
683 concentrated and distributed in 5 ul aliquots in PCR tubes, flash-frozen in liquid nitrogen  
684 and stored at -80°C. Protein concentration was determined by measuring absorbance at  
685 280 nm using a NanoDrop ND-1000 spectrophotometer (Thermo Scientific).

686

687 In most cases, the above method worked well. However, the 6xHis-MBP-mGFP-YBX1-  
688 WT protein fraction contained nucleic acid, which influenced results of the phase  
689 separation experiment. For this reason, the following modified protocol was used to  
690 purify 6xHis-MBP-mGFP-YBX1-WT protein. Pellet fractions were re-suspended in 35  
691 ml lysis buffer (50 mM Tris-HCl 8.5, 2 M KCl, 5% glycerol, 10mM MgCl<sub>2</sub>, 50 ul  
692 Benzonase nuclease, 1 mM DTT, 1 mM PMSF and 1x protease inhibitor cocktail) and  
693 cells were lysed by sonication followed by centrifugation for 60 min at 20, 000 rpm at 4°  
694 C. The supernatant fraction was incubated with 4 ml amylose resin for 1 h. The amylose  
695 resins were transferred to columns and protein-bound beads were washed with lysis  
696 buffer until no protein, as detected by a Bio-Rad protein assay. Bound proteins were  
697 eluted with the elution buffer (50 mM Tris-HCl 8.5, 2M KCl, 5% glycerol, 10 mM

698 MgCl<sub>2</sub>, 50 mM maltose) and concentrated into 500 ul using an Amicon Ultra Centrifugal  
699 Filter Unit. Benzonase nuclease (50 ul) was added to digest nucleic acid at 4 °C  
700 overnight. The sample was diluted into 5 ml using the elution buffer (50 mM Tris-HCl  
701 8.5, 2M KCl, 5% glycerol, 10 mM MgCl<sub>2</sub>, 50 mM maltose) and passed through 2 ml  
702 HisPur™ Ni-NTA resin (ThermoFisher Scientific, catalog number, 88222). The Ni-NTA  
703 column was washed with lysis buffer and the protein was desorbed with 6 ml elution  
704 buffer (50 mM Tris-HCl 8.5, 2M KCl, 5% glycerol, 250 mM Imidazole) and  
705 concentrated into 1 ml using Amicon Ultra Centrifugal Filter Unit. The protein was  
706 further purified by gel filtration (Superdex-200, GE Healthcare) in a column equilibrated  
707 with storage buffer (50 mM Tris-HCl 7.4, 500 mM KCl, 5% glycerol, 1 mM DTT). Peak  
708 fractions corresponding to the desired protein were pooled, concentrated and aliquoted in  
709 PCR tubes, flash-frozen in liquid nitrogen and stored at -80 °C.

#### 710 ***In vitro* phase separation assays**

711 For droplet formation without crowding agents (Fig 2A, up panel, Fig 2B, Fig 2C, and  
712 Fig 2D), proteins were diluted to various concentrations in the buffer containing a final  
713 concentration of 25 mM Tris-HCl, pH 7.4, 75 mM KCl at room temperature. For droplet  
714 formation in the presence of crowding agents (all the other *in vitro* phase separation  
715 experiments), proteins were diluted from a stock solution into buffer containing a final  
716 concentration of 5% dextran, 25 mM Tris-HCl, pH 7.4, 150 mM KCl at room  
717 temperature. Proteins were added as the last component to induce uniform phase  
718 separation. To observe the propensity of RNA to partition into the condensates, we  
719 resuspended RNA in RNase-free water at indicated concentrations. The droplet formation  
720 of purified mGFP-YBX1 and Cy5 labeled miRNAs (together with 10 ng/ul total RNA)  
721 was induced in LLPS buffer (5% dextran, 25 mM Tris-HCl, pH 7.4, 150 mM KCl, 1mM  
722 MgCl<sub>2</sub> (to stabilizes the RNA secondary structure)). The samples were mixed in a  
723 microtube and applied to a coverslip-bottom in 35-mm dishes (MatTek P35G-1.5-14-C).  
724 After all the droplets had settled to the bottom, images were taken using an ECLIPSE  
725 TE2000 microscope (Nikon) with a 100x oil-immersion objective.

#### 726 **Image analysis to determine the partition coefficients and relative condensed protein** 727 **or miRNAs in *in vitro* droplets**

728 Fluorescence microscopy images were acquired using an ECLIPSE TE2000 microscope  
729 with a 100x oil-immersion objective. Quantification and statistical analysis were  
730 performed as previously reported (Wang et al., 2018). Images were analyzed using Fiji  
731 software. All the results are plotted as the mean  $\pm$  the standard deviation (SD). A mask of  
732 the droplets was defined by threshold of the images and removing spurious noise  
733 detection with a median filter window radius equal to 2 pixels. For the background  
734 correction, an image was acquired with the shutter closed and its average intensity was  
735 removed from each pixel contribution. The user parameter was initially set to the value 3  
736 and was adjusted according to the mask of droplets. The partition coefficients ( $PCs$ ) were  
737 defined as the average intensity within the dense phase ( $I_{DP}$ ) divided by average intensity  
738 in the light phase ( $I_{LP}$ ) after background subtraction.  $I_{DP}$  is the average of mean intensities  
739 inside the droplets,  $I_{LP}$  is the mean intensity of the regions outside the droplets. Four  
740 images (1024 x 1024) per condition were analyzed. The relative amount of condensed  
741 ( $RC$ ) protein or miRNA was calculated from the equation:  $RC = I_{in} / I_{in} + I_{out}$ , where  $I_{in}$  is  
742 the integrated intensity inside the droplets and  $I_{out}$  is the total intensity of the region  
743 outside the droplet mask. Where no droplet appeared, the value was set to 0. Three  
744 images (2048 x 2048) for per condition were analyzed.

#### 745 **Fluorescence Recovery After Photobleaching (FRAP)**

746 In vitro droplets were formed by diluting stock protein to a final concentration of 12  $\mu$ M  
747 in 25 mM Tris-HCl, pH 7.4, 150 mM KCl buffer at room temperature. FRAP was  
748 performed on an inverted laser scanning confocal microscope (Zeiss, LSM 710  
749 AxioObserver) with 34-channel spectral detection. Images were acquired with a 63x oil-  
750 immersion objective and a 488 nm laser line was used for detection of GFP fluorescence.  
751 A circular region of  $\sim$ 1  $\mu$ m in diameter was chosen in a region away from the droplet  
752 boundary and bleached with 13 iterations at  $\sim$ 60% of maximum laser power at 488 nm.  
753 The recovery was recorded at a rate of 30 ms/frame, 40 frames in total. For imaging cells,  
754 FRAP was performed using an inverted laser scanning confocal microscope (Zeiss, LSM  
755 880 AxioImager) equipped with a full incubation chamber maintained at 37°C and  
756 supplied with 5% CO<sub>2</sub>. The point region was bleached with 10 iterations of 100% of  
757 maximum laser power of a 514 nm laser. The recovery was recorded at the rate of 2  
758 s/interval, 120 cycles in total for YBX1-WT and 1s/interval, 60 cycles in total for YBX1-

759 F85A. For each sample, a minimum of three independent FRAP experiments were  
760 performed. Pictures were analyzed in Fiji software and FRAP recovery curves were  
761 calculated as previously described (Webster et al., 2015). To account for background and  
762 photo-bleaching effects during acquisition, we used the mean intensity values from the  
763 bleach region (BL), the background region (BG) and the reference signal region (REF) to  
764 calculate the corrected BL (BL\_corr) for each acquisition frame using the equation:

$$765 \text{BL\_corr2}(t) = \text{BL\_corr1}(t) / \text{REF\_corr1}(t) = [\text{BL}(t) - \text{BG}(t)] / [\text{REF}(t) - \text{BG}(t)]$$

766 BL\_corr2 (t) was further normalized to the mean pre-bleach intensities, which were  
767 used to estimate 100% fluorescence intensity:

$$768 \text{BL\_corr3}(t) = \text{BL\_corr2}(t) / \text{BL\_corr2}(\text{pre-bleach})$$

769 Finally, an exponential recovery-like-shape curve was generated by plotting the  
770 normalized fluorescent intensity value to times.

#### 771 **Live-cell imaging under hexanediol treatments**

772 Live cell imaging was performed on an LSM880 microscope with the incubation  
773 chamber maintained at 37°C and 5% CO<sub>2</sub>. U2OS cells expressing YFP-YBX1 were  
774 grown on a coverslip-bottom in 35-mm dishes (MatTek P35G-1.5-14-C) until  
775 approximately 70% confluency and then imaged using the 514 nm laser. The stock  
776 solutions of 1,6-hexanediol (Sigma-Aldrich, 240117) and 2,5-hexanediol (Sigma-Aldrich,  
777 H11904) with different m/v concentrations (20%, 10%, 4%) in phenol-red free medium  
778 were freshly prepared. Right before imaging, the normal cell culture medium was  
779 changed into 1 ml of phenol-red-free medium in the 35 mm dish. After starting the image  
780 acquisition, we added 1 ml of pre-warmed hexanediol stock solution (20%, 10%, 4%) to  
781 the 35 mm dish without pausing imaging to adjust to the final concentrations of 10%, 5%,  
782 or 2%. We treated the time of hexanediol addition as the time “0” when quantification of  
783 surviving puncta in Fig. 1E.

784

#### 785 **Acknowledgments**

786 We thank Dr. Anthony A. Hyman for sharing the plasmids; thank Jie Wang for advice  
787 and sharing the scripts for statistical analysis of partition coefficient and the amount

788 condensed protein/miRNAs; thank Criss Hartzell, Arup Indra, Matthew J Shurtleff, and  
789 Morayma M Temoche-Diaz for suggestions and for reading and editing the manuscript.  
790 We also thank the staff at the UC Berkeley shared facilities, the cell culture facility  
791 (Alison Killilea), Biological imaging facility (Steven Ruzin), the DNA sequencing  
792 facility, the Flow Cytometry Facility, the Electron Microscopy Laboratory and QB3-  
793 Berkeley (The California Institute for Quantitative Biosciences at UC Berkeley). XML  
794 and LM are supported as Associates of the HHMI. RS is an Investigator of the HHMI and  
795 a Senior fellow of the UC Berkeley Miller Institute of Science.

796

#### 797 **Additional information**

#### 798 **Competing interests**

799 Randy Schekman: Reviewing Editor and Founding Editor-in-Chief, *eLife*. The other  
800 authors declare that no competing interests exist.

#### 801 **Funding**

| 802 <b>Funder</b>                                                                                                                   | <b>Grant reference number</b> | <b>Author</b>  |
|-------------------------------------------------------------------------------------------------------------------------------------|-------------------------------|----------------|
| Howard Hughes Medical<br>Institute                                                                                                  | Investigator                  | Randy Schekman |
| The funders had no role in study design, data collection and interpretation, or the<br>decision to submit the work for publication. |                               |                |

803

#### 804 **Author contributions**

805 XML, Conception and design, Acquisition of data, Analysis and interpretation of data,  
806 Drafting or revising the article; LM, Contribution of unpublished essential data or  
807 reagents; RS, Conception and design, Analysis and interpretation of data, Drafting or  
808 revising the article.

809

810

811

## 812 **References**

- 813 Alberti, S., and Hyman, A.A. (2016). Are aberrant phase transitions a driver of cellular  
814 aging? *BioEssays* 38, 959–968.
- 815 Alberti, S., Gladfelter, A., and Mittag, T. (2019). Considerations and challenges in  
816 studying liquid-liquid phase separation and biomolecular condensates. *Cell* 176, 419–  
817 434.
- 818 Baietti, M.F., Zhang, Z., Mortier, E., Melchior, A., Degeest, G., Geeraerts, A., Ivarsson,  
819 Y., Depoortere, F., Coomans, C., Vermeiren, E., et al. (2012). Syndecan–syntenin–ALIX  
820 regulates the biogenesis of exosomes. *Nature Cell Biology* 14, 677–685.
- 821 Banani, S.F., Lee, H.O., Hyman, A.A., and Rosen, M.K. (2017). Biomolecular  
822 condensates: organizers of cellular biochemistry. *Nature Reviews Molecular Cell Biology*  
823 18, 285–298.
- 824 Brangwynne, C.P., Tompa, P., and Pappu, R.V. (2015). Polymer physics of intracellular  
825 phase transitions. *Nature Physics* 11, 899–904.
- 826 Cocucci, E., Racchetti, G., and Meldolesi, J. (2009). Shedding microvesicles: artefacts no  
827 more. *Trends in Cell Biology* 19, 43–51.
- 828 Colombo, M., Raposo, G., and Théry, C. (2014). Biogenesis, secretion, and intercellular  
829 interactions of exosomes and other extracellular vesicles. *Annu. Rev. Cell Dev. Biol.* 30,  
830 255–289.
- 831 Eystathiou, T., Jakymiw, A., Chan, E.K.L., Seraphin, B., Cougot, N., and Fritzler, M.J.  
832 (2003). The GW182 protein colocalizes with mRNA degradation associated proteins  
833 hDcp1 and hLSm4 in cytoplasmic GW bodies. *RNA* 9, 1171–1173.
- 834 Gibbins, D.J., Ciaudo, C., Erhardt, M., and Voinnet, O. (2009). Multivesicular bodies  
835 associate with components of miRNA effector complexes and modulate miRNA activity.  
836 *Nat Cell Biol* 11, 1143–1149.
- 837 Hobor, F., Dallmann, A., Ball, N.J., Cicchini, C., Battistelli, C., Ogrodowicz, R.W.,  
838 Christodoulou, E., Martin, S.R., Castello, A., Tripodi, M., et al. (2018). A cryptic RNA-  
839 binding domain mediates Syncrip recognition and exosomal partitioning of miRNA  
840 targets. *Nature Communications* 9, 831.
- 841 Hubstenberger, A., Courel, M., Bénard, M., Souquere, S., Ernoult-Lange, M., Chouaib,  
842 R., Yi, Z., Morlot, J.-B., Munier, A., Fradet, M., et al. (2017). P-Body Purification  
843 Reveals the Condensation of Repressed mRNA Regulons. *Mol. Cell* 68, 144-157.e5.
- 844 Itzhak, D.N., Tyanova, S., Cox, J., and Borner, G.H. (2016). Global, quantitative and  
845 dynamic mapping of protein subcellular localization. *ELife* 5, e16950.
- 846 Kanaan, N.M., Hamel, C., Grabinski, T., and Combs, B. (2020). Liquid-liquid phase  
847 separation induces pathogenic tau conformations in vitro. *Nat Commun* 11, 2809.

- 848 Kloks, C.P.A.M., Spronk, C.A.E.M., Lasonder, E., Hoffmann, A., Vuister, G.W.,  
849 Grzesiek, S., and Hilbers, C.W. (2002). The solution structure and DNA-binding  
850 properties of the cold-shock domain of the human Y-box protein YB-1. *J. Mol. Biol.* *316*,  
851 317–326.
- 852 Koppers-Lalic, D., Hackenberg, M., Bijnsdorp, I.V., van Eijndhoven, M.A.J., Sadek, P.,  
853 Sie, D., Zini, N., Middeldorp, J.M., Ylstra, B., de Menezes, R.X., et al. (2014).  
854 Nontemplated Nucleotide Additions Distinguish the Small RNA Composition in Cells  
855 from Exosomes. *Cell Reports* *8*, 1649–1658.
- 856 Kroschwald, S., Maharana, S., and Simon, A. (2017). Hexanediol: a chemical probe to  
857 investigate the material properties of membrane-less compartments. *Matters* *3*,  
858 e201702000010.
- 859 Kulkarni, M., Ozgur, S., and Stoecklin, G. (2010). On track with P-bodies. *Biochem. Soc.*  
860 *Trans.* *38*, 242–251.
- 861 Lee, C.-Y.S., Putnam, A., Lu, T., He, S., Ouyang, J.P.T., and Seydoux, G. (2020).  
862 Recruitment of mRNAs to P granules by condensation with intrinsically-disordered  
863 proteins. *ELife* *9*, e52896.
- 864 Lemaitre, R.P., Bogdanova, A., Borgonovo, B., Woodruff, J.B., and Drechsel, D.N.  
865 (2019). FlexiBAC: a versatile, open-source baculovirus vector system for protein  
866 expression, secretion, and proteolytic processing. *BMC Biotechnology* *19*, 20.
- 867 Lin, Y., Mori, E., Kato, M., Xiang, S., Wu, L., Kwon, I., and McKnight, S.L. (2016).  
868 Toxic PR Poly-Dipeptides Encoded by the C9orf72 Repeat Expansion Target LC Domain  
869 Polymers. *Cell* *167*, 789-802.e12.
- 870 Liu, J., Rivas, F.V., Wohlschlegel, J., Yates, J.R., Parker, R., and Hannon, G.J. (2005a).  
871 A role for the P-body component, GW182, in microRNA function. *Nat Cell Biol* *7*,  
872 1261–1266.
- 873 Liu, J., Valencia-Sanchez, M.A., Hannon, G.J., and Parker, R. (2005b). MicroRNA-  
874 dependent localization of targeted mRNAs to mammalian P-bodies. *Nat Cell Biol* *7*, 719–  
875 723.
- 876 Luo, Y., Na, Z., and Slavoff, S.A. (2018). P-Bodies: Composition, Properties, and  
877 Functions. *Biochemistry* *57*, 2424–2431.
- 878 Lyons, S.M., Achorn, C., Kedersha, N.L., Anderson, P.J., and Ivanov, P. (2016). YB-1  
879 regulates tRNA-induced Stress Granule formation but not translational repression.  
880 *Nucleic Acids Res.* *44*, 6949–6960.
- 881 Maharana, S., Wang, J., Papadopoulos, D.K., Richter, D., Pozniakovsky, A., Poser, I.,  
882 Bickle, M., Rizk, S., Guillén-Boixet, J., Franzmann, T.M., et al. (2018). RNA buffers the  
883 phase separation behavior of prion-like RNA binding proteins. *Science* *360*, 918–921.

- 884 Maia, J., Caja, S., Moraes, S., Carolina, M., Couto, N., and Costa-Silva, B. (2018).  
885 Exosome-Based Cell-Cell Communication in the Tumor Microenvironment. *Front. Cell*  
886 *Dev. Biol.* 6.
- 887 Martin, E.W., Holehouse, A.S., Peran, I., Farag, M., Incicco, J.J., Bremer, A., Grace,  
888 C.R., Soranno, A., Pappu, R.V., and Mittag, T. (2020). Valence and patterning of  
889 aromatic residues determine the phase behavior of prion-like domains. *Science* 367, 694–  
890 699.
- 891 Mincheva-Nilsson, L., Baranov, V., Nagaeva, O., and Dehlin, E. (2016). Isolation and  
892 Characterization of Exosomes from Cultures of Tissue Explants and Cell Lines. *Current*  
893 *Protocols in Immunology* 115, 14.42.1-14.42.21.
- 894 Molliex, A., Temirov, J., Lee, J., Coughlin, M., Kanagaraj, A.P., Kim, H.J., Mittag, T.,  
895 and Taylor, J.P. (2015). Phase Separation by Low Complexity Domains Promotes Stress  
896 Granule Assembly and Drives Pathological Fibrillization. *Cell* 163, 123–133.
- 897 Mordovkina, D., Lyabin, D.N., Smolin, E.A., Sogorina, E.M., Ovchinnikov, L.P., and  
898 Eliseeva, I. (2020). Y-Box Binding Proteins in mRNP Assembly, Translation, and  
899 Stability Control. *Biomolecules* 10.
- 900 Moser, J.J., and Fritzler, M.J. (2010). Cytoplasmic ribonucleoprotein (RNP) bodies and  
901 their relationship to GW/P bodies. *Int J Biochem Cell Biol* 42, 828–843.
- 902 Mugler, C.F., Hondele, M., Heinrich, S., Sachdev, R., Vallotton, P., Koek, A.Y., Chan,  
903 L.Y., and Weis, K. (2016). ATPase activity of the DEAD-box protein Dhh1 controls  
904 processing body formation. *ELife* 5, e18746.
- 905 Mukherjee, K., Ghoshal, B., Ghosh, S., Chakrabarty, Y., Shwetha, S., Das, S., and  
906 Bhattacharyya, S.N. (2016). Reversible HuR-microRNA binding controls extracellular  
907 export of miR-122 and augments stress response. *EMBO Rep.* 17, 1184–1203.
- 908 Nedelsky, N.B., and Taylor, J.P. (2019). Bridging biophysics and neurology: aberrant  
909 phase transitions in neurodegenerative disease. *Nat Rev Neurol* 15, 272–286.
- 910 Owen, I., and Shewmaker, F. (2019). The Role of Post-Translational Modifications in the  
911 Phase Transitions of Intrinsically Disordered Proteins. *Int J Mol Sci* 20.
- 912 Pak, C.W., Kosno, M., Holehouse, A.S., Padrick, S.B., Mittal, A., Ali, R., Yunus, A.A.,  
913 Liu, D.R., Pappu, R.V., and Rosen, M.K. (2016). Sequence Determinants of Intracellular  
914 Phase Separation by Complex Coacervation of a Disordered Protein. *Mol Cell* 63, 72–85.
- 915 Palicharla, V.R., and Maddika, S. (2015). HACE1 mediated K27 ubiquitin linkage leads  
916 to YB-1 protein secretion. *Cellular Signalling* 27, 2355–2362.
- 917 Parker, R., and Sheth, U. (2007). P Bodies and the Control of mRNA Translation and  
918 Degradation. *Molecular Cell* 25, 635–646.



- 919 Purice, M.D., and Taylor, J.P. (2018). Linking hnRNP Function to ALS and FTD  
920 Pathology. *Front. Neurosci.* *12*.
- 921 Raposo, G., and Stoorvogel, W. (2013). Extracellular vesicles: Exosomes, microvesicles,  
922 and friends. *J Cell Biol* *200*, 373–383.
- 923 van Roeyen, C.R., Scurt, F.G., Brandt, S., Kuhl, V.A., Martinkus, S., Djudjaj, S.,  
924 Raffetseder, U., Royer, H.-D., Stefanidis, I., Dunn, S.E., et al. (2013). Cold shock Y-box  
925 protein-1 proteolysis autoregulates its transcriptional activities. *Cell Communication and*  
926 *Signaling* *11*, 63.
- 927 Santangelo, L., Giurato, G., Cicchini, C., Montaldo, C., Mancone, C., Tarallo, R.,  
928 Battistelli, C., Alonzi, T., Weisz, A., and Tripodi, M. (2016). The RNA-Binding Protein  
929 SYNCRIP Is a Component of the Hepatocyte Exosomal Machinery Controlling  
930 MicroRNA Sorting. *Cell Rep* *17*, 799–808.
- 931 Sen, G.L., and Blau, H.M. (2005). Argonaute 2/RISC resides in sites of mammalian  
932 mRNA decay known as cytoplasmic bodies. *Nature Cell Biology* *7*, 633–636.
- 933 Shin, Y., and Brangwynne, C.P. (2017). Liquid phase condensation in cell physiology  
934 and disease. *Science* *357*.
- 935 Shurtleff, M.J., Temoche-Diaz, M.M., Karfilis, K.V., Ri, S., and Schekman, R. (2016).  
936 Y-box protein 1 is required to sort microRNAs into exosomes in cells and in a cell-free  
937 reaction. *Elife* *5*.
- 938 Siomi, H., and Siomi, M.C. (2009). RISC hitches onto endosome trafficking. *Nat Cell*  
939 *Biol* *11*, 1049–1051.
- 940 Somasekharan, S.P., El-Naggar, A., Leprivier, G., Cheng, H., Hajee, S., Grunewald,  
941 T.G.P., Zhang, F., Ng, T., Delattre, O., Evdokimova, V., et al. (2015). YB-1 regulates  
942 stress granule formation and tumor progression by translationally activating G3BP1. *J*  
943 *Cell Biol* *208*, 913–929.
- 944 Song, L., Tian, X., and Schekman, R. (2021). Extracellular vesicles from neuronal cells  
945 promote neural induction of mESCs through cyclinD1. *BioRxiv* 2021.05.09.443321.
- 946 Statello, L., Maugeri, M., Garre, E., Nawaz, M., Wahlgren, J., Papadimitriou, A.,  
947 Lundqvist, C., Lindfors, L., Collén, A., Sunnerhagen, P., et al. (2018). Identification of  
948 RNA-binding proteins in exosomes capable of interacting with different types of RNA:  
949 RBP-facilitated transport of RNAs into exosomes. *PLoS ONE* *13*, e0195969.
- 950 Sun, D., Wu, R., Zheng, J., Li, P., and Yu, L. (2018). Polyubiquitin chain-induced p62  
951 phase separation drives autophagic cargo segregation. *Cell Research* *28*, 405–415.
- 952 Tauber, D., Tauber, G., and Parker, R. (2020). Mechanisms and Regulation of RNA  
953 Condensation in RNP Granule Formation. *Trends in Biochemical Sciences* *45*, 764–778.

- 954 Taylor, J.P., Brown, R.H., and Cleveland, D.W. (2016). Decoding ALS: from genes to  
955 mechanism. *Nature* 539, 197–206.
- 956 Teixeira, D., Sheth, U., Valencia-Sanchez, M.A., Brengues, M., and Parker, R. (2005).  
957 Processing bodies require RNA for assembly and contain nontranslating mRNAs. *RNA*  
958 11, 371–382.
- 959 Temoche-Diaz, M.M., Shurtleff, M.J., Nottingham, R.M., Yao, J., Fadadu, R.P.,  
960 Lambowitz, A.M., and Schekman, R. (2019). Distinct mechanisms of microRNA sorting  
961 into cancer cell-derived extracellular vesicle subtypes. *ELife* 8, e47544.
- 962 Temoche-Diaz, M.M., Shurtleff, M.J., and Schekman, R. (2020). Buoyant Density  
963 Fractionation of Small Extracellular Vesicle Sub-populations Derived from Mammalian  
964 Cells. *Bio-Protocol* 10, e3706–e3706.
- 965 Teng, Y., Ren, Y., Hu, X., Mu, J., Samykutty, A., Zhuang, X., Deng, Z., Kumar, A.,  
966 Zhang, L., Merchant, M.L., et al. (2017). MVP-mediated exosomal sorting of miR-193a  
967 promotes colon cancer progression. *Nature Communications* 8, 14448.
- 968 Villarroya-Beltri, C., Gutiérrez-Vázquez, C., Sánchez-Cabo, F., Pérez-Hernández, D.,  
969 Vázquez, J., Martín-Cofreces, N., Martínez-Herrera, D.J., Pascual-Montano, A.,  
970 Mittelbrunn, M., and Sánchez-Madrid, F. (2013). Sumoylated hnRNP A2B1 controls the  
971 sorting of miRNAs into exosomes through binding to specific motifs. *Nat Commun* 4,  
972 2980.
- 973 Wang, J., Choi, J.-M., Holehouse, A.S., Lee, H.O., Zhang, X., Jahnel, M., Maharana, S.,  
974 Lemaitre, R., Pozniakovsky, A., Drechsel, D., et al. (2018). A Molecular Grammar  
975 Governing the Driving Forces for Phase Separation of Prion-like RNA Binding Proteins.  
976 *Cell* 174, 688-699.e16.
- 977 Webster, A., Li, S., Hur, J.K., Wachsmuth, M., Bois, J.S., Perkins, E.M., Patel, D.J., and  
978 Aravin, A.A. (2015). Aub and Ago3 are recruited to nuage through two mechanisms to  
979 form a ping-pong complex assembled by Krimper. *Mol Cell* 59, 564–575.
- 980 Wheeler, R.J., and Hyman, A.A. (2018). Controlling compartmentalization by non-  
981 membrane-bound organelles. *Philosophical Transactions of the Royal Society B:*  
982 *Biological Sciences* 373, 20170193.
- 983 Xing, W., Muhrad, D., Parker, R., and Rosen, M.K. (2020). A quantitative inventory of  
984 yeast P body proteins reveals principles of composition and specificity. *ELife* 9, e56525.
- 985 Yamasaki, A., Alam, J.M., Noshiro, D., Hirata, E., Fujioka, Y., Suzuki, K., Ohsumi, Y.,  
986 and Noda, N.N. (2020). Liquidity Is a Critical Determinant for Selective Autophagy of  
987 Protein Condensates. *Molecular Cell* 77, 1163-1175.e9.
- 988 Yang, W.-H., and Bloch, D.B. (2007). Probing the mRNA processing body using protein  
989 macroarrays and “autoantigenomics.” *RNA* 13, 704–712.

- 990 Yang, P., Mathieu, C., Kolaitis, R.-M., Zhang, P., Messing, J., Yurtsever, U., Yang, Z.,  
991 Wu, J., Li, Y., Pan, Q., et al. (2020). G3BP1 Is a Tunable Switch that Triggers Phase  
992 Separation to Assemble Stress Granules. *Cell* *181*, 325-345.e28.
- 993 Yang, X.-J., Zhu, H., Mu, S.-R., Wei, W.-J., Yuan, X., Wang, M., Liu, Y., Hui, J., and  
994 Huang, Y. (2019). Crystal structure of a Y-box binding protein 1 (YB-1)-RNA complex  
995 reveals key features and residues interacting with RNA. *J. Biol. Chem.* *294*, 10998–  
996 11010.
- 997 Youn, J.-Y., Dyakov, B.J.A., Zhang, J., Knight, J.D.R., Vernon, R.M., Forman-Kay, J.D.,  
998 and Gingras, A.-C. (2019). Properties of Stress Granule and P-Body Proteomes.  
999 *Molecular Cell* *76*, 286–294.
- 1000 Zhang, G., Wang, Z., Du, Z., and Zhang, H. (2018). mTOR Regulates Phase Separation  
1001 of PGL Granules to Modulate Their Autophagic Degradation. *Cell* *174*, 1492-1506.e22.
- 1002 Zhao, Y.G., and Zhang, H. (2020). Phase Separation in Membrane Biology: The  
1003 Interplay between Membrane-Bound Organelles and Membraneless Condensates.  
1004 *Developmental Cell* *55*, 30–44.
- 1005
- 1006

## 1007 **Figure legends**

1008

1009 **Figure 1.** YBX1 forms liquid-like condensates in cells.

1010 (A) Subcellular localization of YBX1 in WT and  $\Delta$ YBX1 from U2OS cells as visualized by  
1011 YBX1 antibody. DAPI staining (blue) indicates the location of nuclei.

1012 (B) FRAP images show recovery of YFP-YBX1 puncta after photobleaching. U2OS cells with  
1013 stable expression of YFP-YBX1 was subjected to FRAP analysis. The inset images (middle)  
1014 are the representative FRAP images. The recovery kinetics of YFP-YBX1 are shown in the  
1015 bottom. Error bars represent standard errors with n=3.

1016 (C) The effect of 10% 1,6-hexanediol on YFP-YBX1 puncta in cells. This image was performed  
1017 on ECLIPSE TE2000 microscope at room temperature.

1018 (D) Fluorescence images of YFP-YBX1 after treatment with 5% 1,6-hexanediol or 10% 2,5-  
1019 hexanediol. Live cell imaging was performed on an LSM880 microscope with the  
1020 incubation chamber maintained at 37°C and 5% CO<sub>2</sub>. (See methods in details)

1021 (E) Number of YFP-YBX1 puncta surviving over time after treatment with 1,6-hexanediol and  
1022 2,5-hexanediol. Error bars represent standard errors with n=3.

1023 (F) Representative images of YBX1 puncta coalescence. This live cell imaging was performed  
1024 on an LSM880 microscope with the incubation chamber maintained 37°C and 5% CO<sub>2</sub>.

1025 Scale bars, 3  $\mu$ m.

1026

1027 **Figure 2.** YBX1 forms liquid-like droplets *in vitro*.

1028 (A) Phase separation of YBX1 at different concentrations with or without addition of a crowding  
1029 agent. Phase separation was induced by diluting the salt concentration from 500 mM to 75  
1030 mM or 150mM in this assay.

1031 (B) The effect of 10% 1,6-hexanediol on YBX1 droplets *in vitro*. Phase separation was induced  
1032 by diluting the salt concentration from 500 mM to 75 mM in this assay.

1033 (C) Representative images of YBX1 droplets coalescence *in vitro*. Phase separation was induced  
1034 by diluting the salt concentration from 500 mM to 75 mM in this assay.

1035 (D, E) Images (D) and quantification (E) of recovery of YBX1 droplets after photobleaching. A  
1036 representative result of three independent experiments is shown. Phase separation was  
1037 induced by diluting the salt concentration from 500 mM to 75 mM in this assay. Error bars  
1038 represent standard errors.

1039 Scale bars, 3  $\mu$ m.

1040

1041 **Figure 3.** YBX1 phase separation is governed by association of aromatic and basic amino acids  
1042 in C-terminal IDR.

1043 (A) Structural organization of YBX1. Top, IUPred, prediction of disordered protein regions;  
1044 Middle, NCPR, net charge per residue with a sliding window of 5 residues; Net positive,  
1045 blue, net negative, red; Bottom, visualization outputs for residue plots.

1046 (B) Schematic diagrams of different YBX1 mutants with the distribution of mutated amino acids.

1047 (C) Truncation mapping and identification of residues in YBX1 C-terminal IDR that are required  
1048 for YBX1 condensation formation. YFP fused YBX1 wild type and mutants were introduced  
1049 in  $\Delta$ YBX1 U2OS cells by transient transfection and visualized by fluorescence microscopy.

1050 (D) Phase separation of YBX1 wild type and variants at the indicated concentrations. 6xHis-

1051 MBP-mGFP fused YBX1 wild type and variant proteins were purified from insect cells.

1052 Phase separation was induced by diluting the salt concentration from 500 mM to 150mM in  
1053 this assay.

1054 Scale bars, 3  $\mu$ m.

1055

1056 **Figure 3—figure supplement 1.** YBX1 amino acid sequences and secondary structure  
1057 prediction.

1058 (A) Secondary structure of YBX1 was predicted using PSIPRED 4.0 based on amino acid  
1059 sequences.

1060 (B) Secondary structure of YBX1 was predicted using D2P2 (Database of Disordered Protein  
1061 Prediction, <http://d2p2.pro> ) based on amino acid sequences.

1062

1063 **Figure 3—figure supplement 2.** The ability of YBX1 to form LLPS requires C-terminal IDR,  
1064 likely depending on tyrosine and basic amino acids arginine and lysine.

1065 (A) Schematic diagrams of YBX1 truncation analysis.

1066 (B) Analysis of condensation formation for different YBX1 truncations in U2OS cells. YFP-  
1067 fused YBX1 mutants were introduced in  $\Delta$ YBX1 U2OS cells by transient transfection and  
1068 visualized by fluorescence microscopy.

1069 (C) Identification of residues in YBX1 C-terminal IDR that are involved in YBX1 condensation  
1070 formation.

1071 (D) SDS-PAGE of YBX1 wild-type and variants tagged with 6xHis-MBP-mGFP.

1072 (E) Phase separation of YBX1 N-terminal at the indicated concentrations.

1073 Scale bars, 3  $\mu$ m.

1074

1075 **Figure 3—figure supplement 3.** A F85A mutation did not affect YBX1 liquid droplet formation  
1076 *in vitro*.

1077 (A) Mutation of F85A caused YBX1 to translocate into nucleus. YFP-fused YBX1 wild type and  
1078 F85A were introduced in  $\Delta$ YBX1 U2OS cells by stable transfection and visualized by  
1079 fluorescence microscopy.

1080 (B) YBX1-F85 is not deficient for YBX1 liquid droplet formation. 6xHis-MBP-mGFP fused  
1081 YBX1 wild type and F85A protein were purified from insect cells. Phase separation was  
1082 induced by diluting the salt concentration from 500 mM to 150mM in this assay.

1083 (C, D) Images (C) and quantification (D) of recovery of YBX1-F85A signal after photobleaching.  
1084 A representative result of three independent experiments is shown. Error bars represent  
1085 standard errors.

1086 Scale bars, 3  $\mu$ m.

1087

1088 **Figure 4.** IDR-driven YBX1 phase separation is required for sorting YBX1 into exosomes.

1089 (A) Representative microscope images from cells expressing mCherry-RAB5<sup>Q79L</sup>. Confocal  
1090 micrographs of cells expressing mCherry-RAB5<sup>Q79L</sup>, alone (upper row) or with EGFP (lower  
1091 row). Cells are stained with anti-CD63 (upper row) or with anti-GFP (lower row).

1092 (B) Confocal micrographs of cells expressing mCherry-RAB5<sup>Q79L</sup> and YFP-YBX1.

1093 (C) Over-expression of YBX1 increased the secretion of YBX1 in EVs. Immunoblots for the  
1094 indicated protein markers in cells and high-speed pellet fractions. The numbers under the  
1095 YBX1 blot represent quantification analysis of endogenous YBX1, YFP-YBX1 and YFP-  
1096 YBX1-F85A in cells and sedimentable particles by Fiji software. “\*” is a non-specific band;  
1097 Blue arrow represents endogenous YBX1; Red arrow represents fusion YBX1 or YBX1-  
1098 F85A.

1099 (D) IDR-driven YBX1 phase separation is required for YBX1 secretion in EVs. Immunoblots for  
1100 the indicated protein markers in cells and high-speed pellet fractions. The numbers under the  
1101 YFP blot represent quantification analysis of endogenous YBX1 and variants in cells and  
1102 sedimentable particles by Fiji software.

1103 (E) Proteinase K protection assay on high-speed pellet fractions. Triton X-100 (0.5%) was used  
1104 to disrupt the membranes. Immunoblots for YBX1, ALIX, Flotillin-2, and CD9 are shown.

1105 (F) Proteinase K protection assay on high-speed pellet fractions from U2OS cells expressing  
1106 YFP-YBX1. Triton X-100 (0.5%) was used to disrupt the membranes. Immunoblots for  
1107 YBX1, ALIX, Flotillin-2, and CD9 are shown.

- 1108 (G) Schematic showing exosome purification with buoyant density flotation in a sucrose step  
1109 gradient.
- 1110 (H) Nanoparticle tracking analysis (NTA) quantification of exosomes from cultured U2OS cells.
- 1111 (I) YFP-YBX1 detected in sucrose post-flotation fraction. Immunoblots for YBX1, ALIX, and  
1112 CD63 from buoyant exosomes are shown.
- 1113 (J) Schematic showing exosome purification with buoyant density flotation in a linear iodixanol  
1114 gradient.
- 1115 (K) Immunoblots across the iodixanol gradient for classical exosome markers CD9, CD63 and  
1116 ALIX (the left panel). Collection of fractions F15-F17 corresponding to high density vesicles  
1117 and immunoblots for YBX1 and CD9. The numbers under YBX1 blot and CD9 blot represent  
1118 quantification analysis of YFP-YBX1-WT or YFP-YBX1-F85A and CD9 in HD vesicles,  
1119 respectively, by Fiji software.
- 1120 Scale bars, 3  $\mu$ m.

1121

1122 **Figure 4—figure supplement 1.** YBX1 entering into ILVs is dependent on IDR-driven phase  
1123 separation.

- 1124 (A) Confocal micrographs of cells expressing mChery-RAB5<sup>Q79L</sup> and YFP tagged YBX1  
1125 variants.
- 1126 (B) Nanoparticle tracking analysis (NTA) quantification of exosomes from cultured HEK293T  
1127 cells.
- 1128 (C) Representative electron micrographs of negative stained exosomes purified from 10/40%  
1129 sucrose interface. Scale bar is 100 nm.
- 1130 Scale bars, 3  $\mu$ m.

1131

1132 **Figure 5.** IDR-driven YBX1 phase separation is required for sorting miR-223 into exosomes.

- 1133 (A) Relative abundance of miRNAs detected in exosomes compared to cellular levels from both  
1134 HEK293T cells and U2OS cells. Exosomes were purified as in Figure 4G. Fold change of  
1135 miRNAs in cells and purified exosomes from indicated cells quantified by RT-qPCR. Data  
1136 are plotted from three independent experiments and error bars represent standard derivations.
- 1137 (B) Overexpression of YBX1 increases sorting of miR-223 into exosomes both in HEK293T  
1138 cells and U2OS cells. Exosomes were purified as in Figure 4G. Fold change of miR-223 in  
1139 cells and purified exosomes from indicated cells quantified by RT-qPCR. Relative miR-223  
1140 enrichment was calculated by fold change (Exo/cells) of YBX1-OE divided by fold change

1141 (Exo/cells) of endogenous YBX1. Data are plotted from three independent experiments and  
1142 error bars represent standard derivations.

1143 (C) Analysis of wild-type and CRISPR/Cas9 genome edited HEK293T clones by immunoblot for  
1144 YBX1 (top) and actin (bottom).

1145 (D) The accumulation of miR-223 in cells and depletion of miR-223 in exosomes derived from  
1146  $\Delta$ YBX1 and WT cells. Exosomes were purified as in Figure 4G. Fold change of miR-223 in  
1147 cells and purified exosomes from indicated cells quantified by RT-qPCR. Data are plotted  
1148 from three independent experiments for HEK293T cells and two independent experiments for  
1149 U2OS cells; error bars represent standard derivations from independent samples.

1150 (E) Residues contributing to YBX1 phase separation are required for sorting miR-223 into  
1151 exosomes. Exosomes were purified as in Figure 4J. Fold change of miR-223 in cells and  
1152 purified exosomes from indicated cells quantified by RT-qPCR. All quantifications represent  
1153 means from three independent experiments and error bars represent standard derivations.

1154 Scale bars, 3  $\mu$ m.

1155

1156 **Figure 5—figure supplement 1.** IDR-driven YBX1 phase separation is required for sorting miR-  
1157 223 into the growth medium.

1158 (A) CRISPR/Cas9-induced mutagenesis results of YBX1 knockout. Schematic of the targeted  
1159 region of YBX1 (up panel) and Sanger sequencing results of YBX1 knockout clones 9 and  
1160 41 (bottom panel). Primer-F and primer-R were used to amplify the region around the gRNA  
1161 recognition site. The PCR product was cloned into vector pCR2.1-TOPO. An M13-reverse  
1162 primer was used for Sanger sequencing. Representative sequencing alignment of wild-type  
1163 and YBX1 mutant alleles is shown. YBX1 knockout 9 has two unique mutations (67 bp  
1164 deletion; 80 bp deletion) among 18 sequenced clones. YBX1 knockout 41 has another two  
1165 subtype mutations (big deletion; big deletion plus big insertion) among 19 sequenced clones.

1166 (B) Relative mRNA expression of YBX1 by RT-PCR in YBX1 KO cells generated by  
1167 CRISPR/Cas9. Beta ( $\beta$ )-actin was used for normalization. Data are plotted as the fold  
1168 change over WT control, and represent the mean  $\pm$  SD of three independent experiments.

1169 (C) miR-223 secretion into medium in WT and YBX1 KO cells from HEK293T cells. About 200  
1170  $\mu$ l cell culture medium was harvested at each time point and was used to extract RNA after  
1171 centrifugation at 1,500  $\times$ g for 15 min to remove debris. The amount of miR-223 was  
1172 quantified by RT-qPCR. Data are plotted as the fold change over time zero. Different samples  
1173 are normalized by total cell number.



1174 (D) Residues in YBX1-IDR that drive LLPS are required for miR-223 secretion into the growth  
1175 medium in culture of HEK293T cells. The experiment was performed as (C).

1176

1177 **Figure 6.** YBX1 phase-separated droplets recruit miRNAs with selectivity correlated with the  
1178 exosome sorting ability *in vivo*.

1179 (A) YBX1 phase-separated droplets recruit miR-223. Purified mGFP-YBX1 was incubated with  
1180 Cy5 labeled miR-223 together with 10 ng/ul total RNA in LLPS buffer and then observed  
1181 under a microscope.

1182 (B, C) The recruitment of miR-223 into YBX1 phase-separated droplets depends on the ability of  
1183 YBX1 to bind RNA rather than phase separation. Representative images (400 x 400 pixels)  
1184 (B) and quantification (C) of condensed miR-223 and YBX1 protein. Relative amount  
1185 condensed protein or miRNAs was calculated as ratio of total intensity of protein inside  
1186 droplets to total intensity of protein both inside and outside of droplets as quantified using Fiji  
1187 software. Three images (2048 x 2048 pixels) for per condition were analyzed. The results are  
1188 plotted as the mean  $\pm$  the standard deviation (SD).

1189 (D, E) YBX1 liquid droplets recruit miRNAs in a selective manner. Purified mGFP-YBX1 was  
1190 incubated with Cy5 labeled miR-223, miR-190 or miR-144 individually, together with 10  
1191 ng/ul total cellular RNA in LLPS buffer and then observed under a microscope.

1192 Representative images (400 x 400 pixels) (D) and quantification (E) of condensed miRNAs  
1193 and YBX1 protein. Relative amounts of condensed protein and RNA were calculated as  
1194 described in Fig. 6C. Three images (2048 x 2048 pixels) per condition were analyzed. The  
1195 results are plotted as the mean  $\pm$  the standard deviation (SD).

1196 (F) RIP assay with GFP-trap beads on YFP-YBX1 expressing HEK293T cell extracts. miRNAs  
1197 in immunoprecipitated samples were determined by RT-qPCR using Taqman miRNAs assay,  
1198 and reported as percentage of input sample (% input). Data are plotted as means  $\pm$  SD of  
1199 three independent experiments.

1200 (G) YBX1-CTD-Y to S mutant recruits miRNAs inefficiently but selectively. Purified mGFP-  
1201 YBX1-CTD-Y to S was incubated with Cy5 labeled miR-223, miR-190 or miR-144  
1202 independently, together with 10 ng/ul total cellular RNA in LLPS buffer and then observed  
1203 under a microscope.

1204 (H) YBX1-CTD-RK to G mutant failed to phase separate and recruit miRNAs. Purified mGFP-  
1205 YBX1-CTD-RK to G was incubated with Cy5 labeled miR-223, miR-190 or miR-144  
1206 independently, together with 10 ng/ul total cellular RNA in LLPS buffer and then observed  
1207 under a microscope.

1208 (I) Quantification of condensed miRNAs and YBX1 protein from (G). Relative amount of  
1209 condensed protein and RNA were calculated as described in Fig. 6C. Three images (2048 x  
1210 2048 pixels) per condition were analyzed. The results are plotted as the mean  $\pm$  the standard  
1211 deviation (SD).

1212 (J) YBX1 is required for sorting miR-223 but not miR-190 and miR-144 into exosomes.  
1213 Exosomes were purified as in Figure 4G. Fold change of miR-223, miR-190 and miR-144 in  
1214 cells and purified exosomes from indicated cells quantified by RT-qPCR. All quantifications  
1215 represent means from three independent experiments and error bars represent standard  
1216 derivations.

1217 Scale bars, 3  $\mu$ m.

1218

1219 **Figure 6—figure supplement 1.** RNA regulates the phase separation behavior of YBX1.

1220 (A) Representative images of purified YBX1 *in vitro* in the presence of total cellular RNA.

1221 Scale bars, 3  $\mu$ m.

1222

1223 **Figure 6—figure supplement 2.** miRNAs differ in affinity to YBX1 phase-separated droplets.

1224 (A) YBX1 phase-separated droplet miRNA recruitment selectivity enhanced upon addition of 10  
1225 ng/ul cellular RNA. Purified mGFP-YBX1 was incubated with Cy5 labeled miR-223 or miR-  
1226 190 individually, together with 10 ng/ul cellular RNA in LLPS buffer and then observed  
1227 under a microscope.

1228 (B) miR-223 selectively partitions into YBX1 phase-separated droplets but miR-190 does not.

1229 Purified mGFP-YBX1 was incubated with Cy5 labeled miR-223 or miR-190 at different  
1230 concentrations individually in LLPS buffer and then observed under a microscope. The  
1231 representative images for 100nM miRNAs are shown here.

1232 (C) Relative quantification from (B) for partition coefficient. Partition coefficient was calculated

1233 as a ratio of mean intensity within droplets to mean intensity outside of droplets using Fiji  
1234 software. Four images (1024 x 1024 pixels) for per condition were analyzed.

1235 Scale bars, 3  $\mu$ m.

1236

1237 **Figure 7.** Condensation of YBX1 in PBs is required for sorting miRNAs into exosomes.

1238 (A) YBX1 condensates co-localized with P-body marker EDC4. Indirect immunofluorescence  
1239 was used to show that YBX1 localized to P-bodies. Cells were stained with anti-YBX1 and  
1240 anti-EDC4 antibodies.

1241 (B) YBX1 condensates co-localized with P-body markers Dcp1a and DDX6. Cells were stained

- 1242 with anti-YBX1 and anti-Dcp1 antibodies (upper row), or with anti-YFP and anti-DDX6  
1243 antibodies (lower row).
- 1244 (C) YBX1 condensation into P-bodies dependent on IDR-driven phase separation. YFP-fused  
1245 YBX1 wild type and variants were introduced in  $\Delta$ YBX1 U2OS cells by stable transfection  
1246 and visualized by fluorescence microscopy. Cells were stained with anti-YBX1 and anti-  
1247 EDC4 antibodies.
- 1248 (D) The Venn diagram shows overlap between YBX1 proteome and previously reported P-body  
1249 proteome.
- 1250 (E) GO analysis (molecular function) of genes associated with YBX1.
- 1251 (F) Proteins identified by either 3xFlag-YBX1-IP or mGFP-YBX1-IP, coupled with mass  
1252 spectrometry.
- 1253 (G) Coimmunoprecipitation of DDX6 with YBX1.
- 1254 (H) Residues in YBX1-IDR that drive LLPS are required for its interaction with DDX6.
- 1255 (I) DDX6 resides in exosomes. Proteinase K protection assay for DDX6 using exosomes that  
1256 were isolated by buoyant density flotation. Triton X-100 (0.5% ) was used to disrupt the  
1257 membranes. Immunoblots for DDX6, ALIX, and CD9 are shown.
- 1258 (J) Identification of P-body components in purified exosomes from HEK293T cells by LC-  
1259 MS/MS. Exosomes were purified as in Figure 4G.

1260 Scale bars, 3  $\mu$ m.

1261

1262 **Figure 7—figure supplement 1.** SYNCRIP forms condensates and co-localizes with YBX1 and  
1263 P-body marker DDX6.

- 1264 (A) SYNCRIP condensates co-localized with YBX1 and P-body marker DDX6. Indirect  
1265 immunofluorescence was performed. Cells were stained with anti- SYNCRIP, anti-YBX1  
1266 and anti-DDX6 antibodies.

1267 Scale bars, 3  $\mu$ m.

1268

1269 **Figure 8.** Diagram representing a working model of miRNA selectively sorted into exosomes by  
1270 phase-separated YBX1 condensates. Cytosolic RBP YBX1 forms liquid-like condensates in cells  
1271 and liquid droplets *in vitro*. Phase separation of YBX1 is governed by a C-terminal IDR, most  
1272 likely through the association of aromatic amino acid tyrosine and basic amino acids arginine or  
1273 lysine. Phase-separated YBX1 recruits miRNAs in a selective manner through N-terminal CSD-  
1274 mediated specific protein-RNA interaction. YBX1 condensation increases its local concentration  
1275 and the affiliation with P body components (such as DDX6), which further facilitates YBX1 and

1276 its cognate miRNAs sorting into exosomes. Segregation of RNA and RBPs for capture by  
1277 invagination into an endosome occurs at the level of granule formation or by sorting of selected  
1278 RNAs and RBPs from larger, more heterogeneous granules.

1279

1280

1281

1282

1283

1284

1285

1286

1287

1288

1289

1290

1291

1292

1293

1294

1295

1296

1297

1298

1299

1300

1301

1302

1303

1304

1305

1306

1307

1308

1309

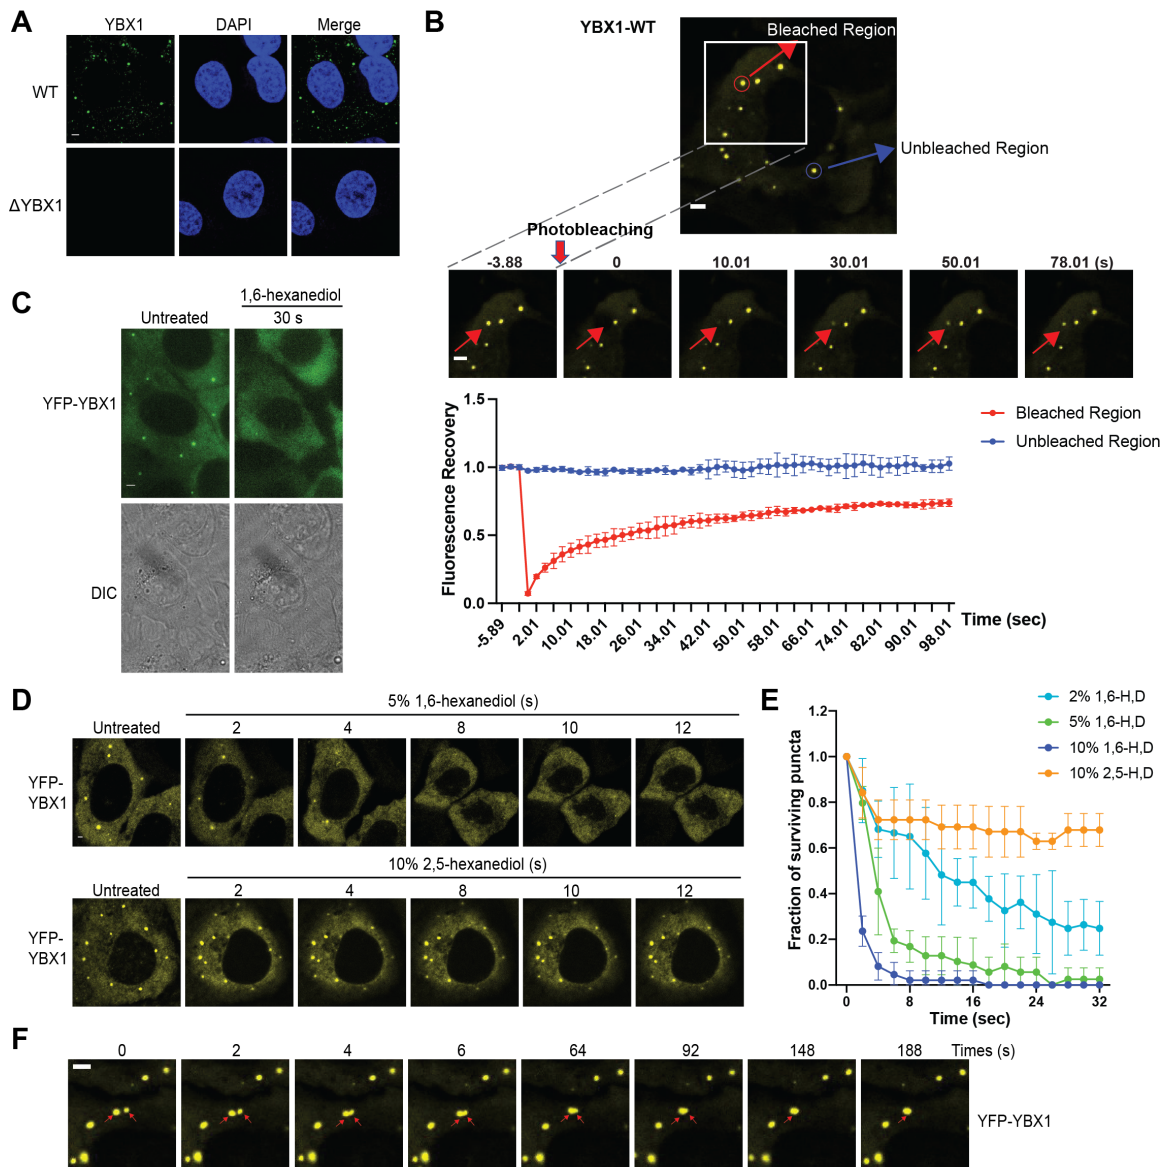

1310

1311

1312 **Figure 1.** YBX1 forms liquid-like condensates in cells.

1313

1314

1315

1316

1317

1318

1319

1320

1321

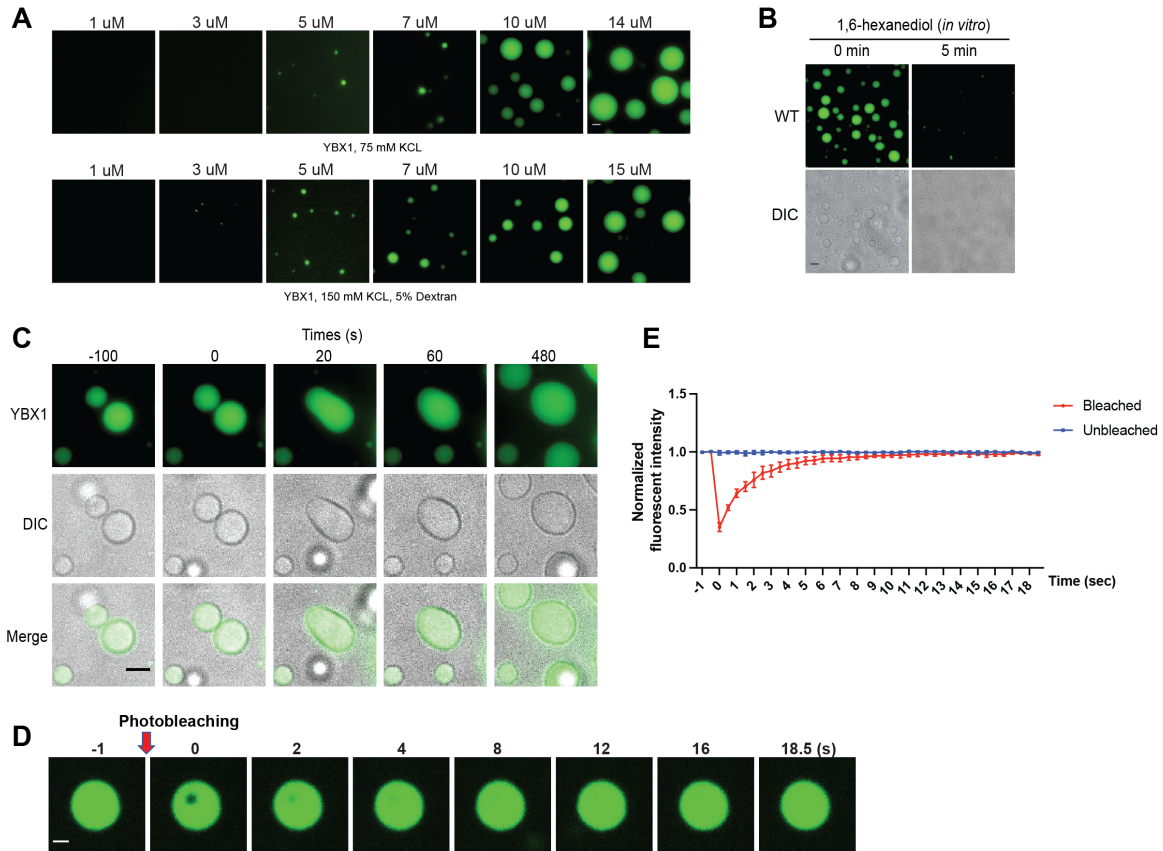

1322

1323

1324 **Figure 2.** YBX1 forms liquid-like droplets *in vitro*.

1325

1326

1327

1328

1329

1330

1331

1332

1333

1334

1335

1336

1337

1338

1339

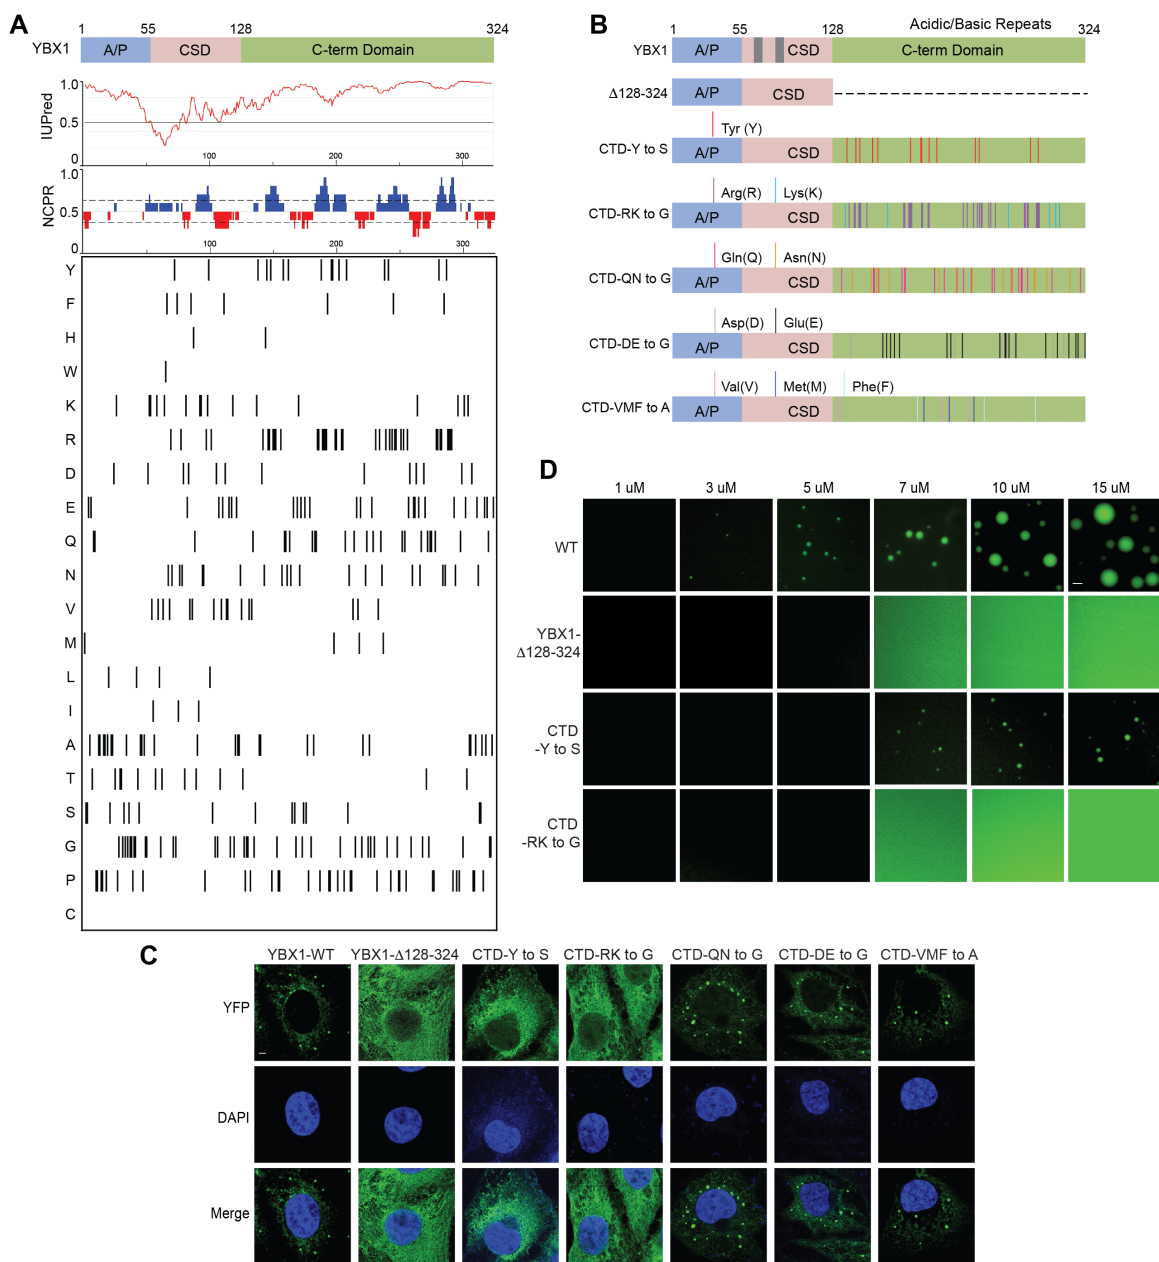

1340

1341

1342 **Figure 3.** YBX1 phase separation is governed by association of aromatic and basic amino acids

1343 in C-terminal IDR.

1344

1345

1346

1347

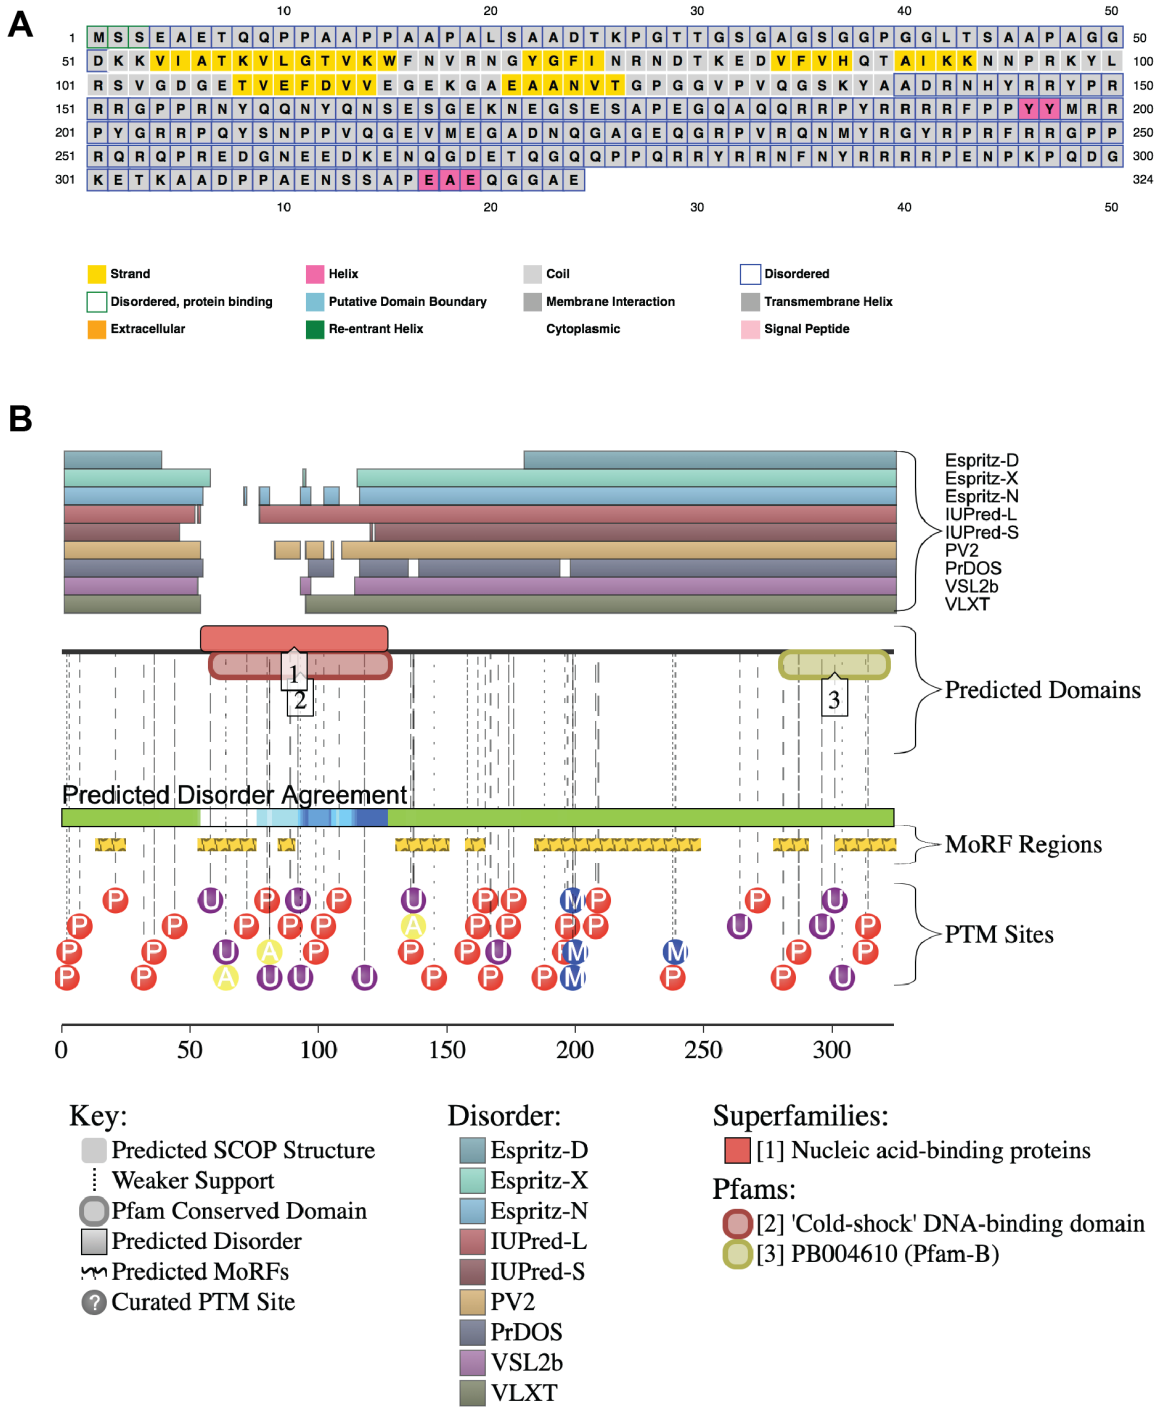

1348

1349 **Figure 3—figure supplement 1.** YBX1 amino acid sequences and secondary  
 1350 prediction.

1351

1352



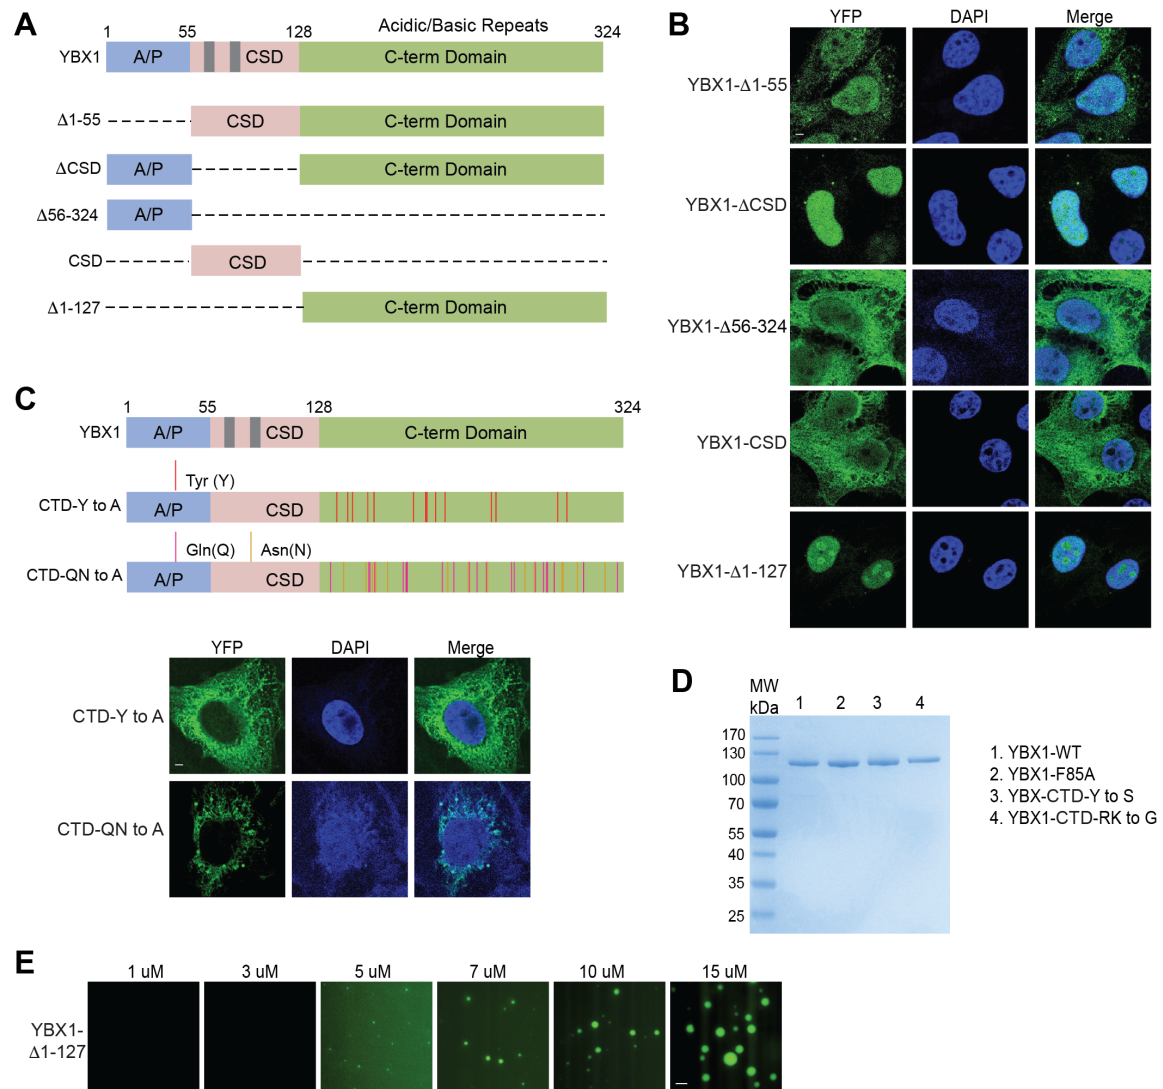

1353

1354

1355 **Figure 3—figure supplement 2.** The ability of YBX1 to form LLPS requires C-terminal IDR,

1356 likely depending on tyrosine and basic amino acids arginine and lysine.

1357

1358

1359

1360

1361

1362

1363

1364

1365

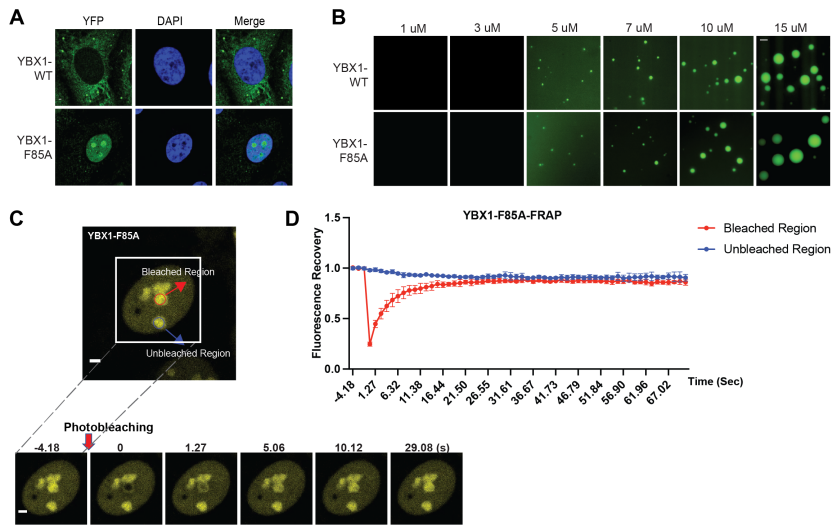

1366

1367

1368 **Figure 3—figure supplement 3.** A F85A mutation did not affect YBX1 liquid droplet formation

1369 *in vitro*.

1370

1371

1372

1373

1374

1375

1376

1377

1378

1379

1380

1381

1382

1383

1384

1385

1386

1387

1388

1389

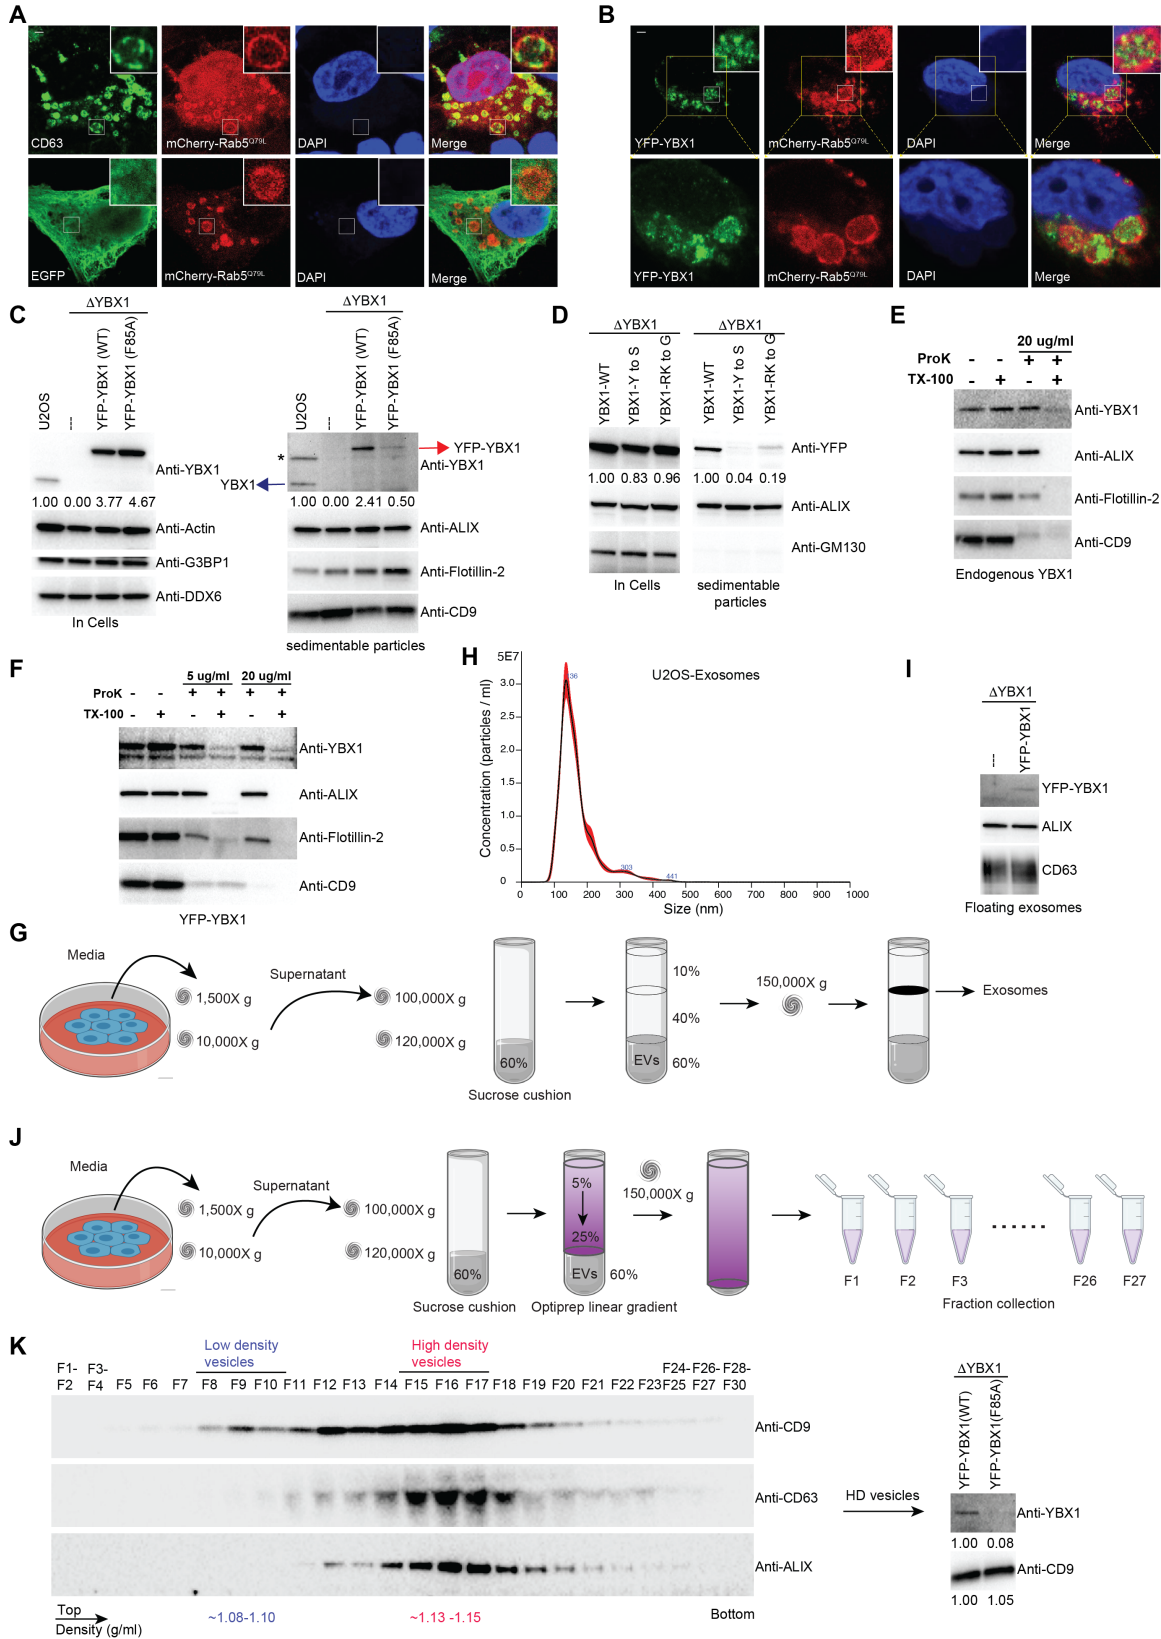

1390

1391

**Figure 4.** IDR-driven YBX1 phase separation is required for sorting YBX1 into exosomes.

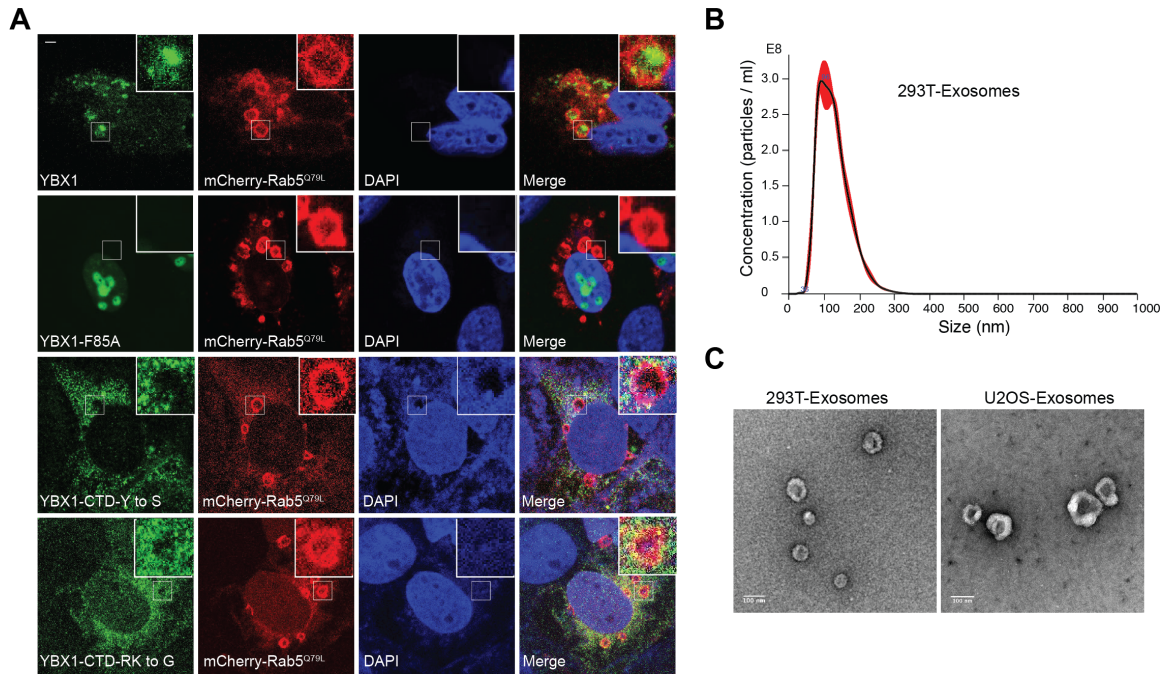

1392

1393

1394 **Figure 4—figure supplement 1.** YBX1 entering into ILVs is dependent on IDR-driven phase

1395 separation.

1396

1397

1398

1399

1400

1401

1402

1403

1404

1405

1406

1407

1408

1409

1410

1411

1412

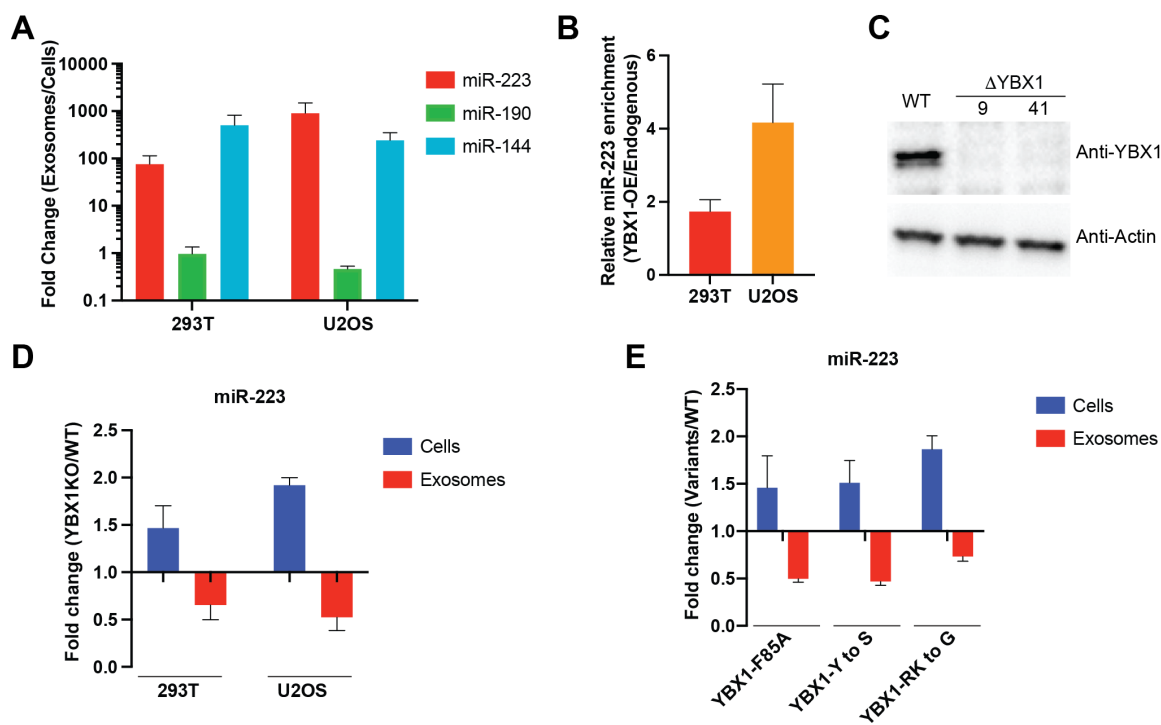

1413

1414

1415 **Figure 5.** IDR-driven YBX1 phase separation is required for sorting miR-223 into exosomes.

1416

1417

1418

1419

1420

1421

1422

1423

1424

1425

1426

1427

1428

1429

1430

1431

1432



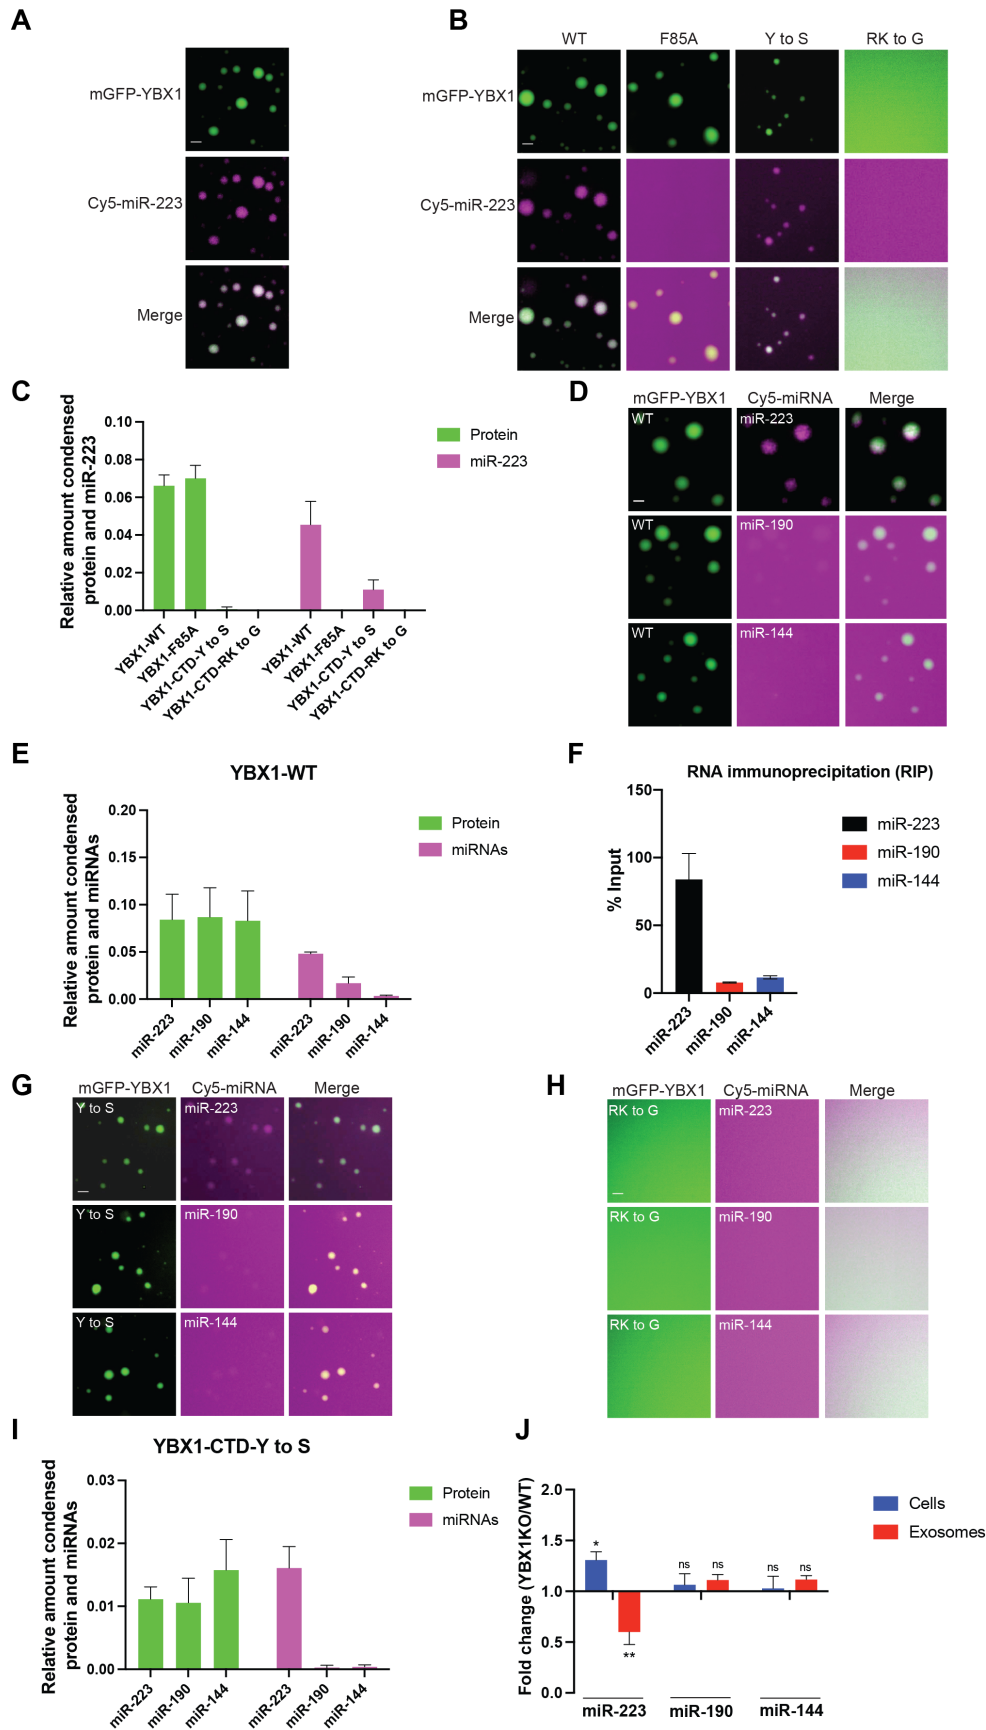

1438 **Figure 6.** YBX1 phase-separated droplets recruit miRNAs with selectivity correlated with the  
1439 exosome sorting ability *in vivo*.

1440

1441

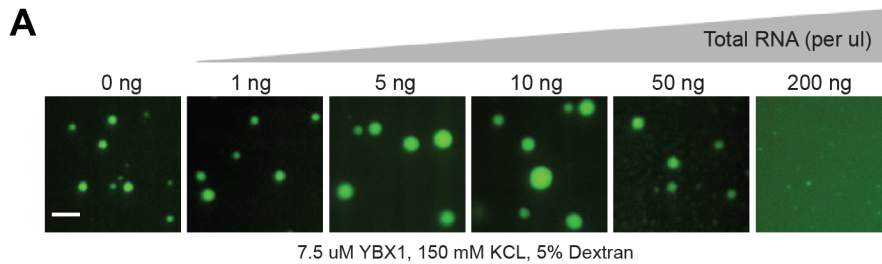

1442

1443

1444 **Figure 6—figure supplement 1.** RNA regulates the phase separation behavior of YBX1.

1445

1446

1447

1448

1449

1450

1451

1452

1453

1454

1455

1456

1457

1458

1459

1460

1461

1462

1463

1464

1465



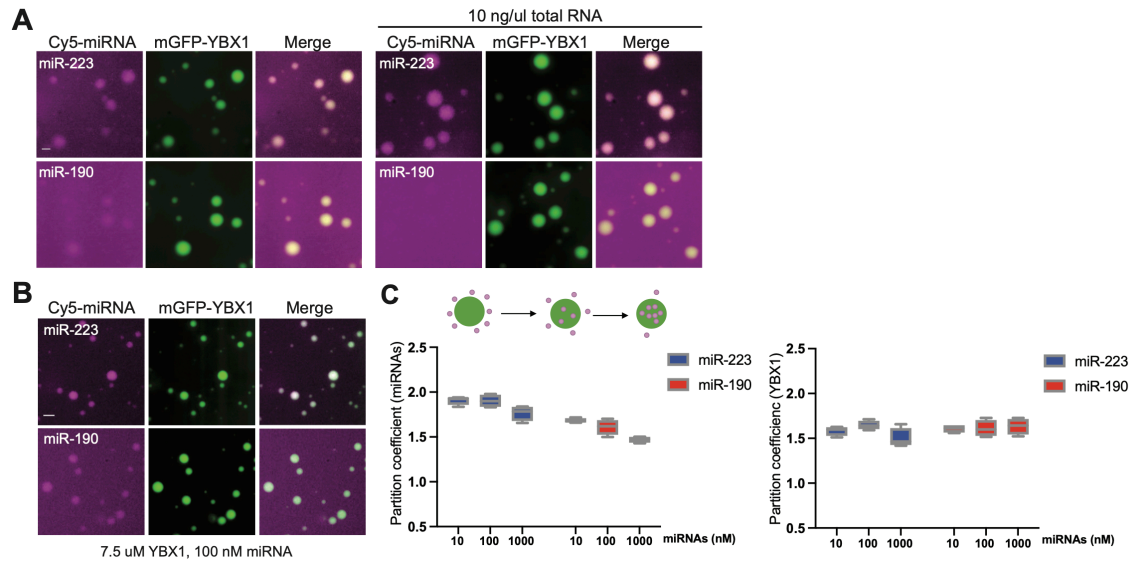

1466

1467

1468 **Figure 6—figure supplement 2.** miRNAs differ in affinity to YBX1 phase-separated droplets.

1469

1470

1471

1472

1473

1474

1475

1476

1477

1478

1479

1480

1481

1482

1483

1484

1485

1486

1487

1488

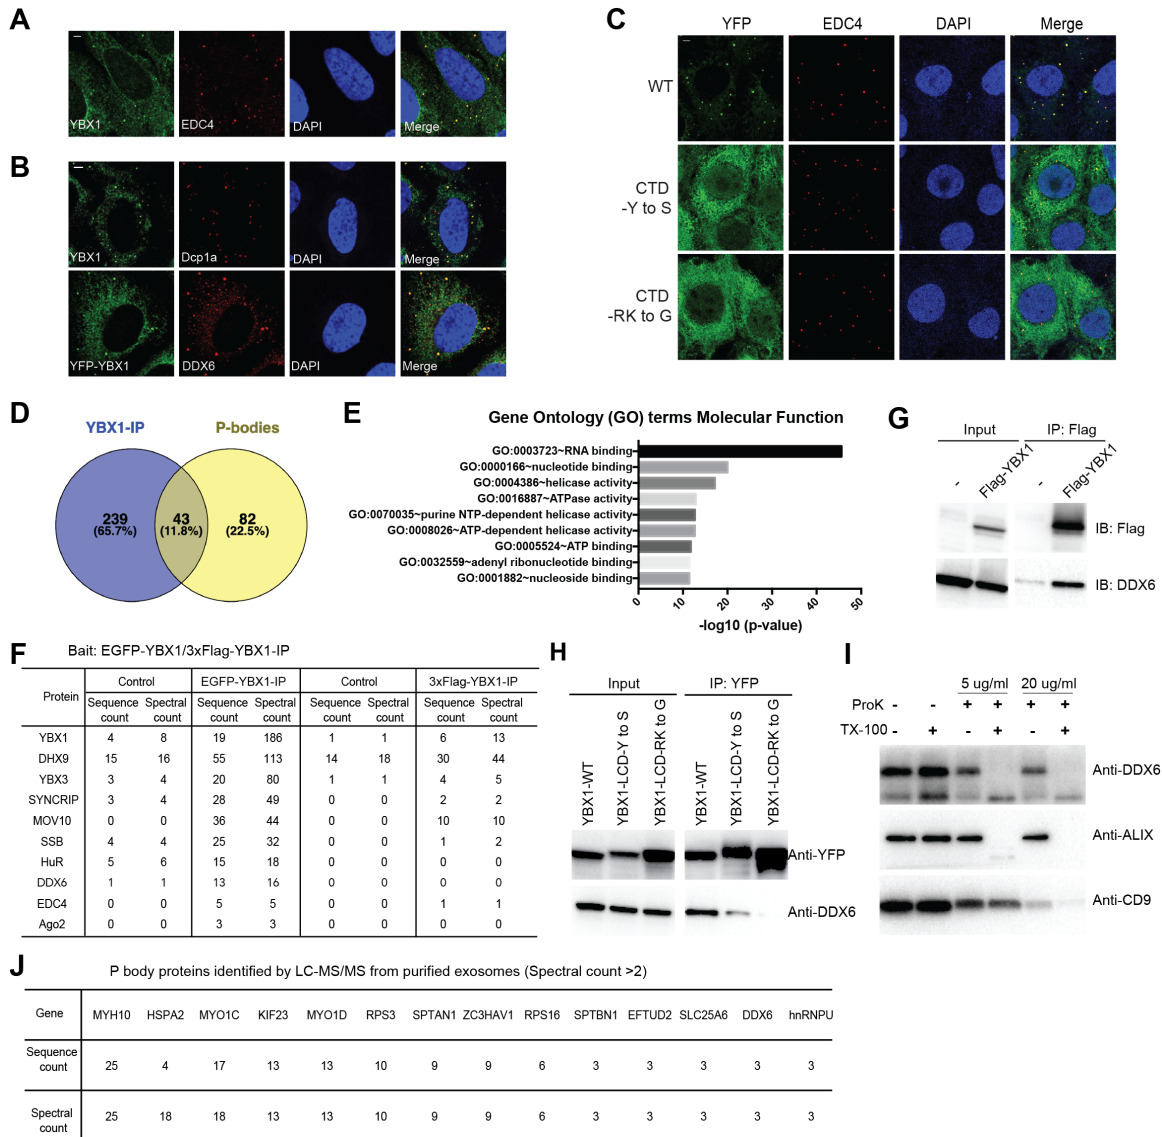

**Figure 7.** Condensation of YBX1 in PBs is required for sorting miRNAs into exosomes.

1489

1490

1491

1492

1493

1494

1495

1496

1497

1498

1499

1500

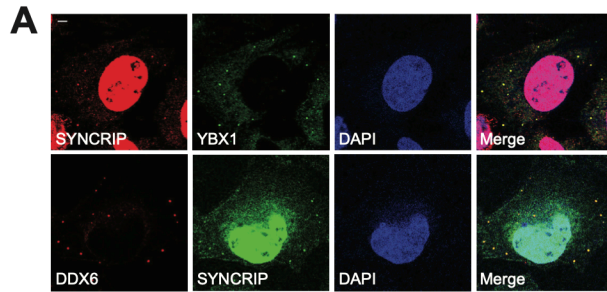

1501

1502

1503 **Figure 7—figure supplement 1.** SYNCRIP forms condensates and co-localizes with YBX1 and

1504 P-body marker DDX6.

1505

1506

1507

1508

1509

1510

1511

1512

1513

1514

1515

1516

1517

1518

1519

1520

1521

1522

1523

1524

1525

1526

1527

1528

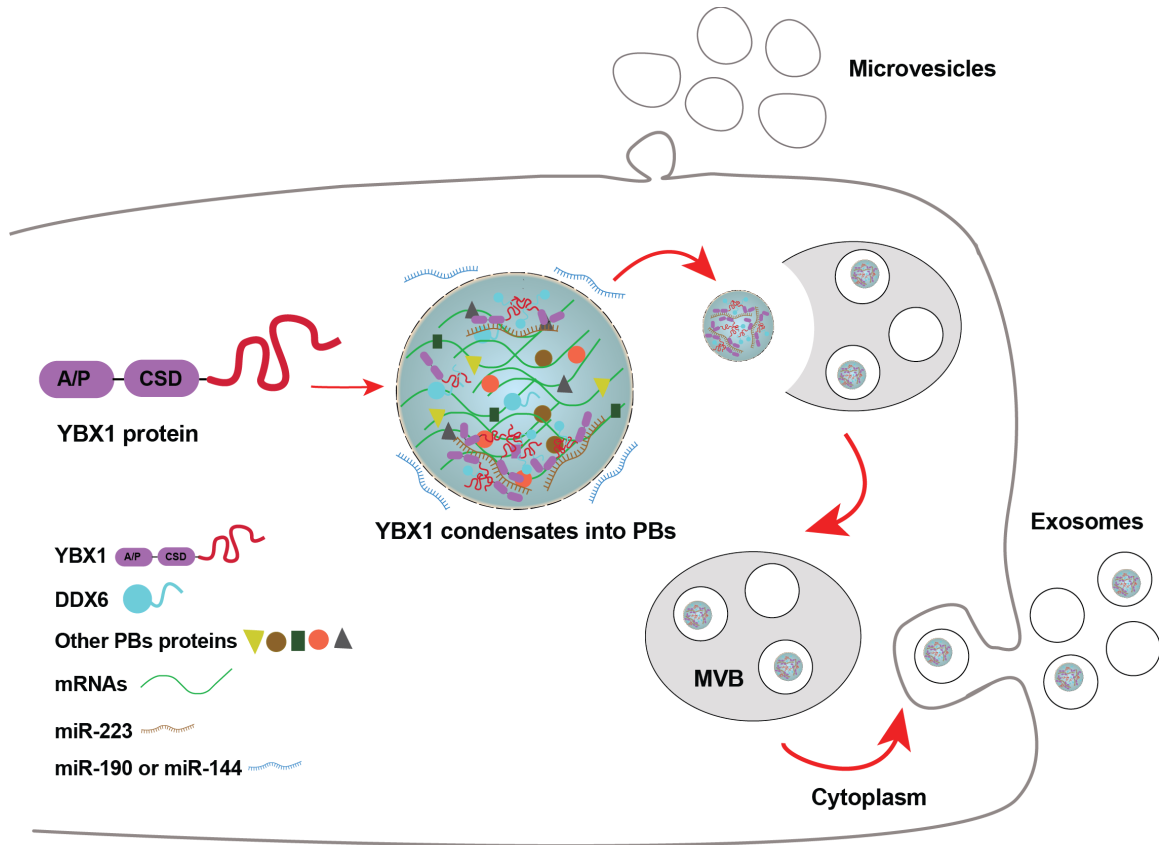

1529

1530 **Figure 8.** Diagram representing a working model of miRNA selectively sorted into exosomes by  
1531 phase-separated YBX1 condensates.

1532
